# Supplementary material
Source: PubMed Central journal article supplement (PMC4521799)
Supplement: ja5b05707_si_001.pdf [file ja5b05707_si_001.pdf]

**Supporting Information: Cofactor-mediated conformational dynamics  
promote product release from *E. coli* dihydrofolate reductase via an allosteric  
pathway**

David Oyen, R. Bryn Fenwick, Robyn L. Stanfield, H. Jane Dyson and Peter E. Wright\*

Department of Integrative Structural and Computational Biology and Skaggs Institute for Chemical  
Biology, The Scripps Research Institute, 10550 North Torrey Pines Road, La Jolla, California 92037,  
United States.

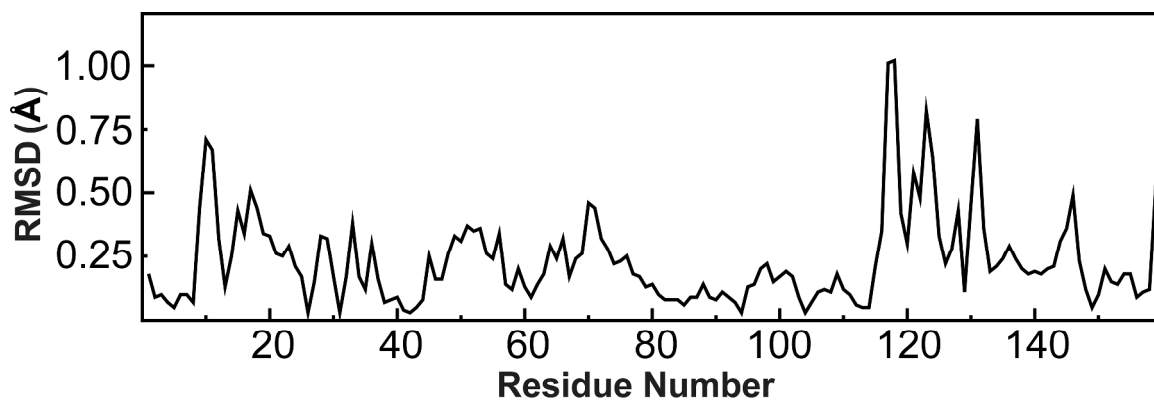

**Figure S1.** The  $C_{\alpha}$  main-chain coordinate RMSDs between the WT and L28F E:ddTHF:NADP<sup>+</sup> crystal structures plotted as a function of the residue number. The largest deviation is seen for residues 120-130, because of the poorer electron density in that region. The RMSD between the structures is very small, indicating minimal structural perturbation of the backbone upon mutation.

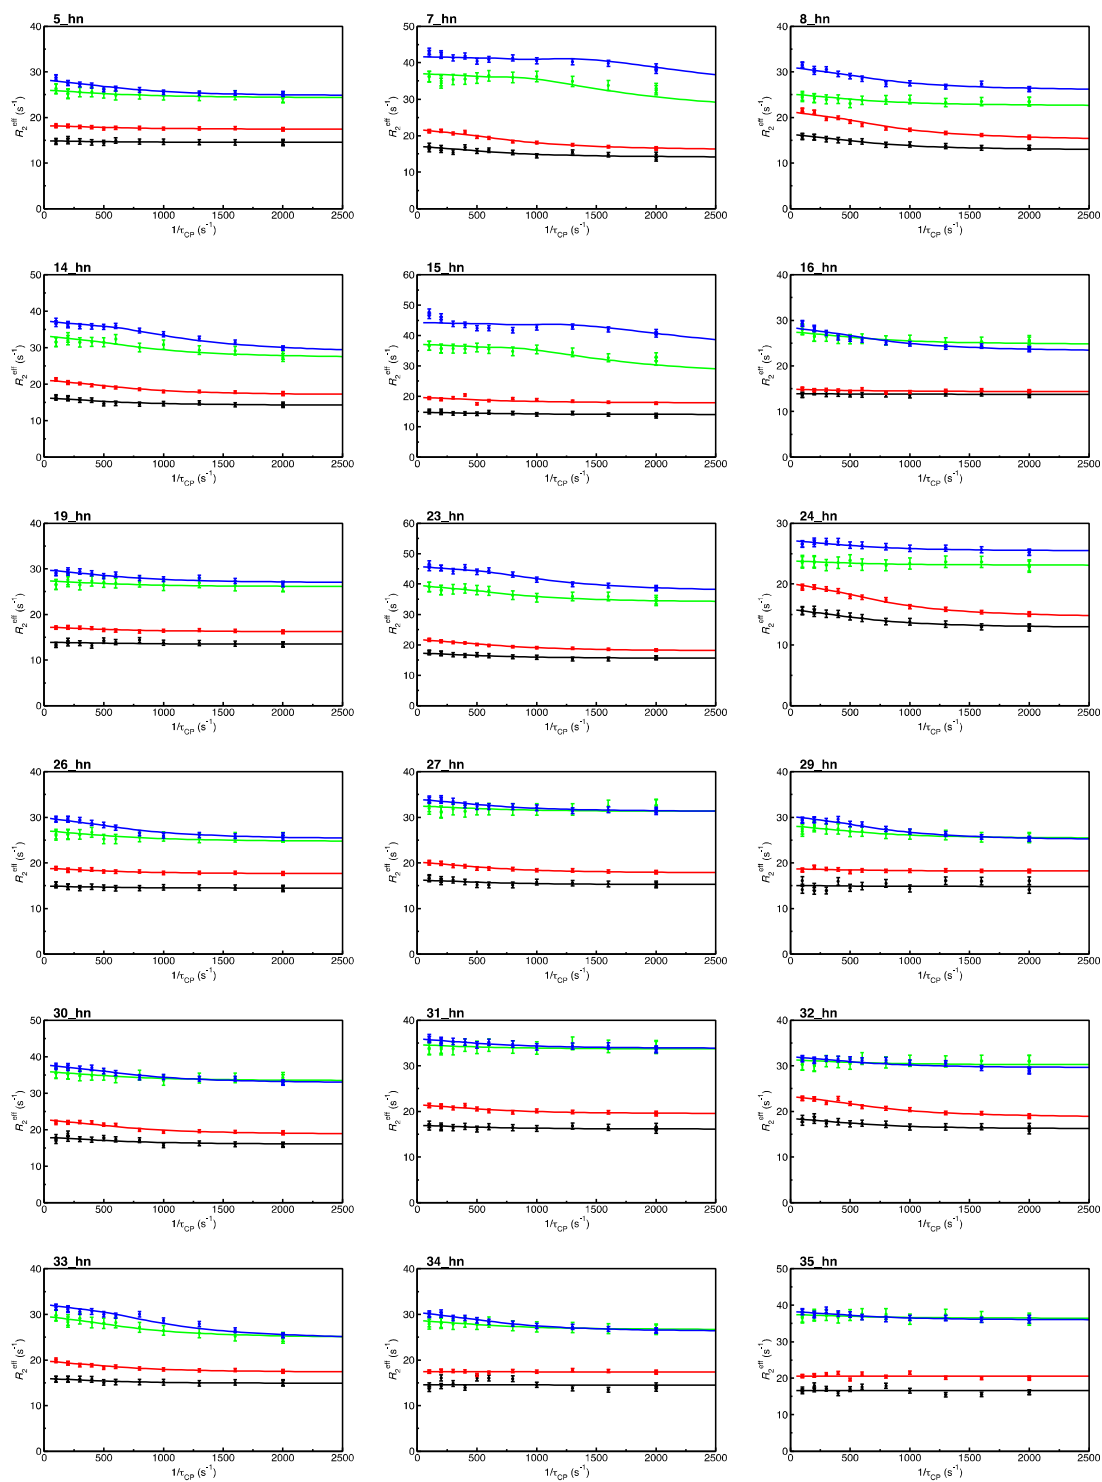

**Figure S2.**  $R_2$  relaxation dispersion profiles for the WT E:THF:NADPH complex at 300 K, pH 7.6. Black and red, amide  $^{15}\text{N}$  dispersion data at 11.7 and 18.8 T, respectively. Green and blue, amide  $^1\text{H}$  dispersion data at 11.7 (500 MHz) and 18.8 T (800 MHz), respectively. Solid lines indicate the best fit of the data to a global two-site exchange model.

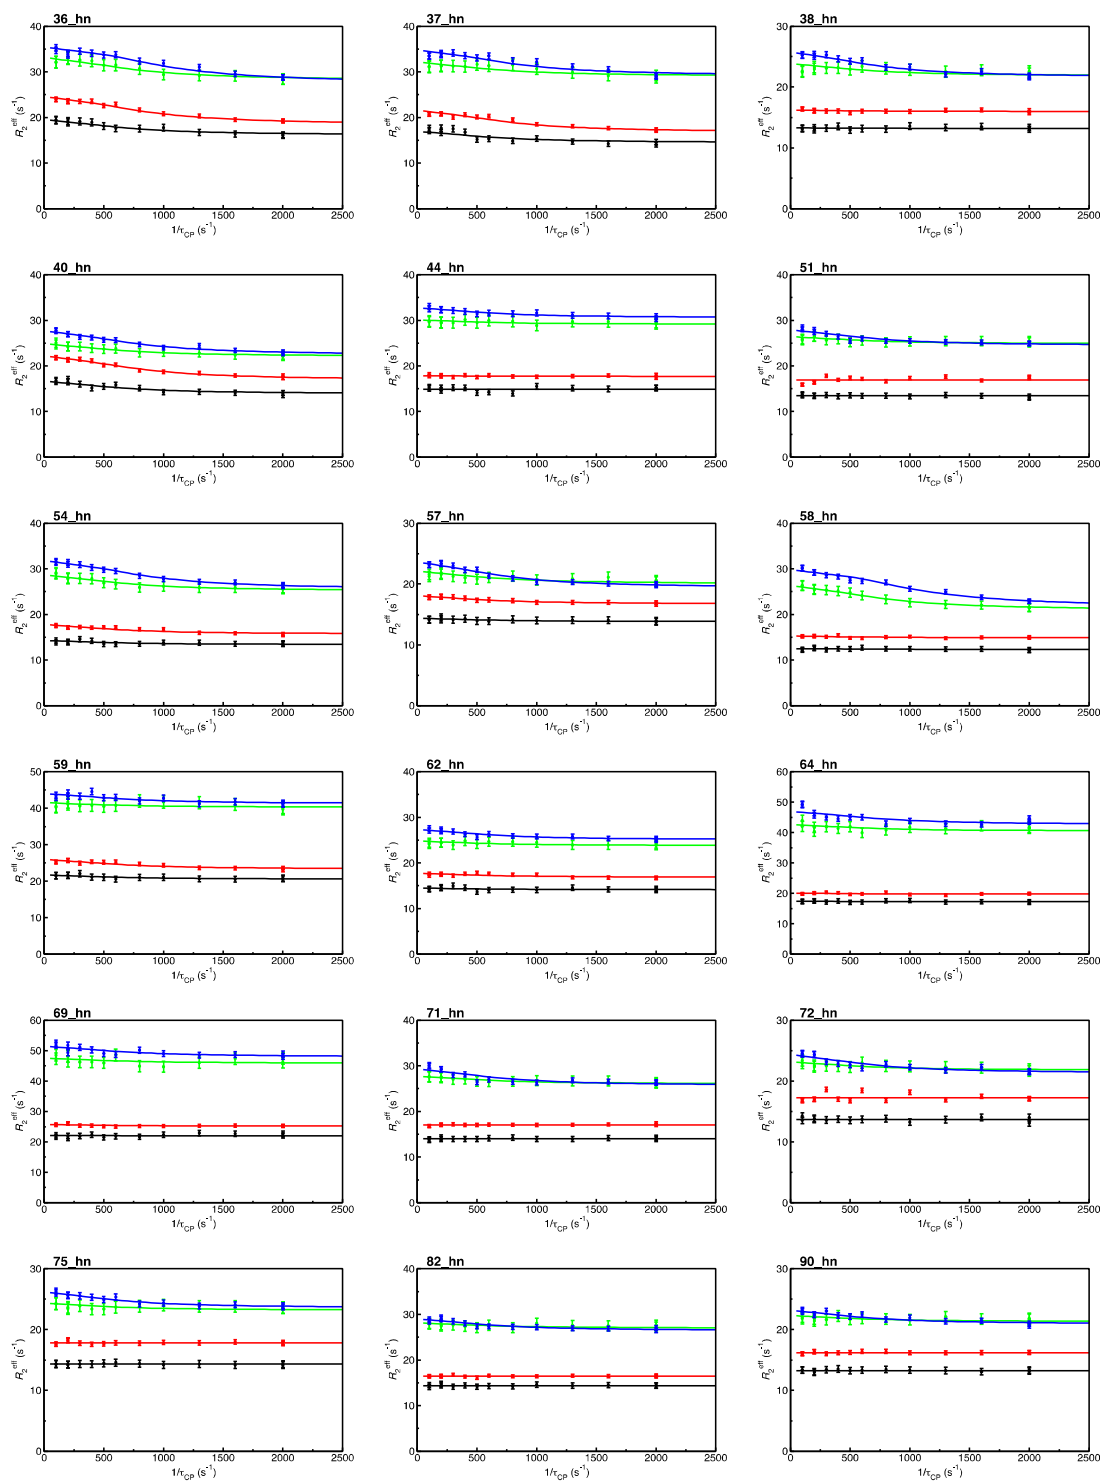

**Figure S2 (Continued).**  $R_2$  relaxation dispersion profiles for the WT E:THF:NADPH complex at 300 K, pH 7.6.

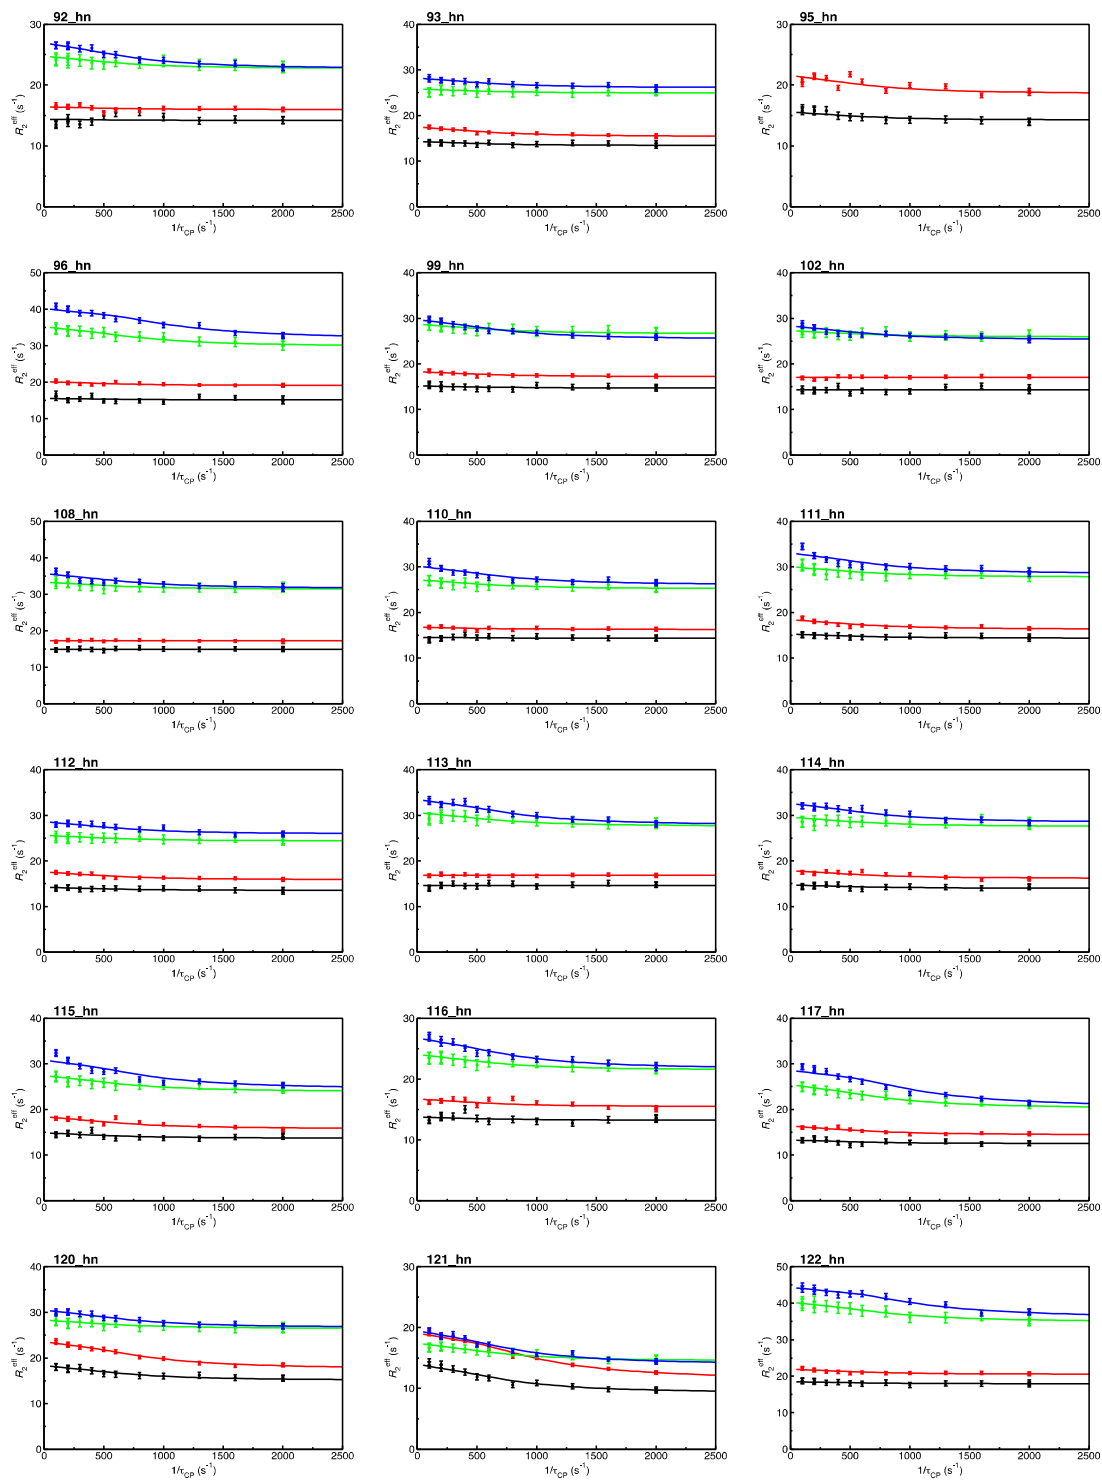

Figure S2 (Continued).  $R_2$  relaxation dispersion profiles for the WT E:THF:NADPH complex at 300 K, pH 7.6.

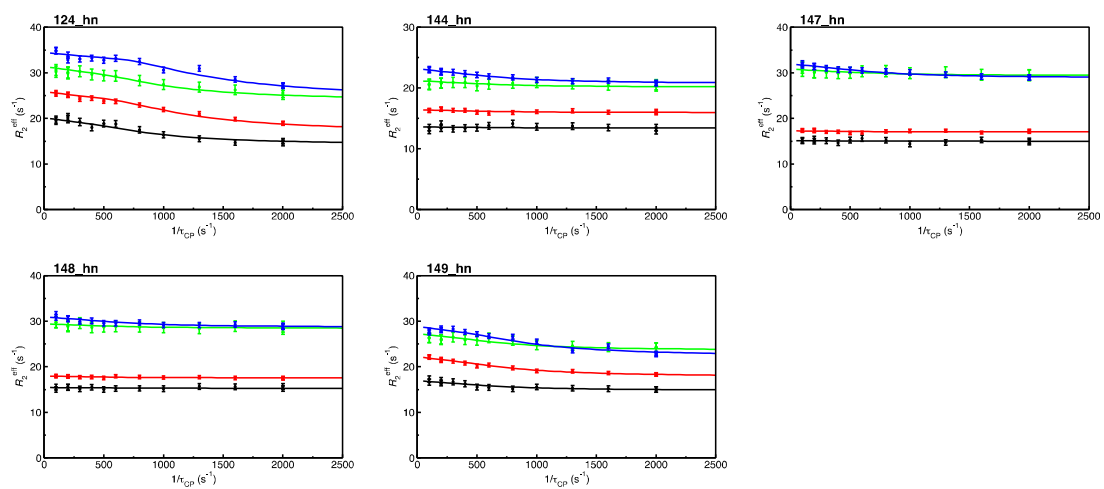

**Figure S2 (Continued).**  $R_2$  relaxation dispersion profiles for the WT E:THF:NADPH complex at 300 K, pH 7.6.

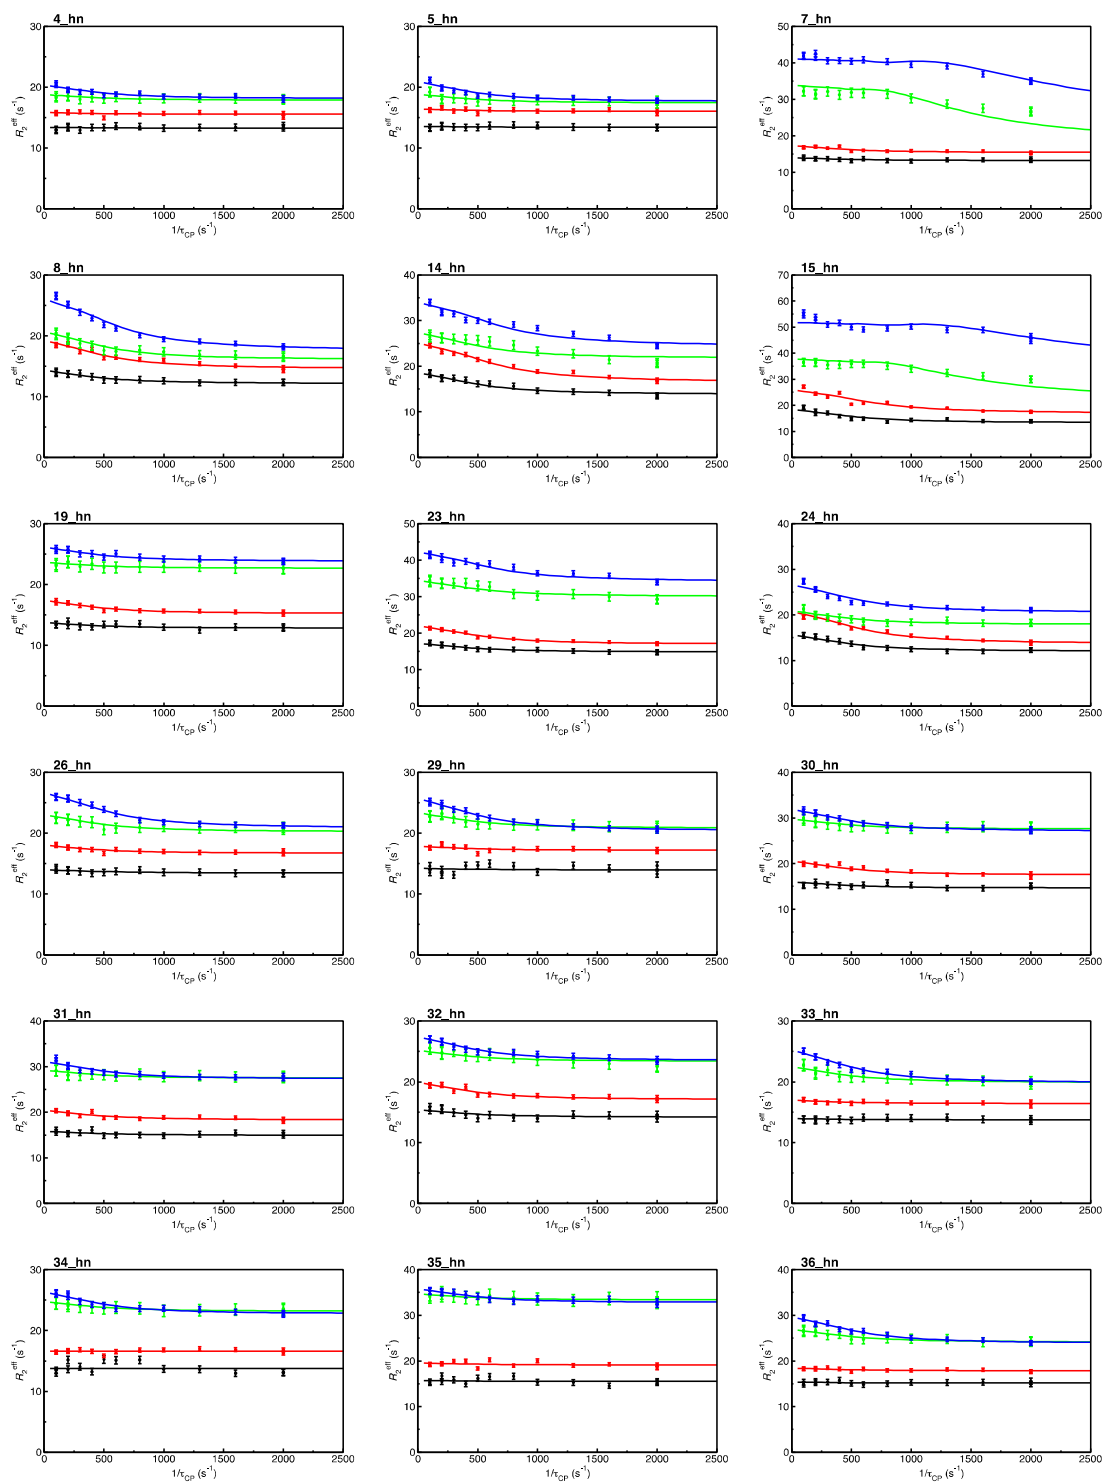

**Figure S3.**  $R_2$  relaxation dispersion profiles for the WT E:THF:NADP<sup>+</sup> complex at 300 K, pH 7.6. Black and red, amide <sup>15</sup>N dispersion data at 11.7 and 18.8 T, respectively. Green and blue, amide <sup>1</sup>H dispersion data at 11.7 (500 MHz) and 18.8 T (800 MHz), respectively. Solid lines indicate the best fit of the data to a global two-site exchange model.

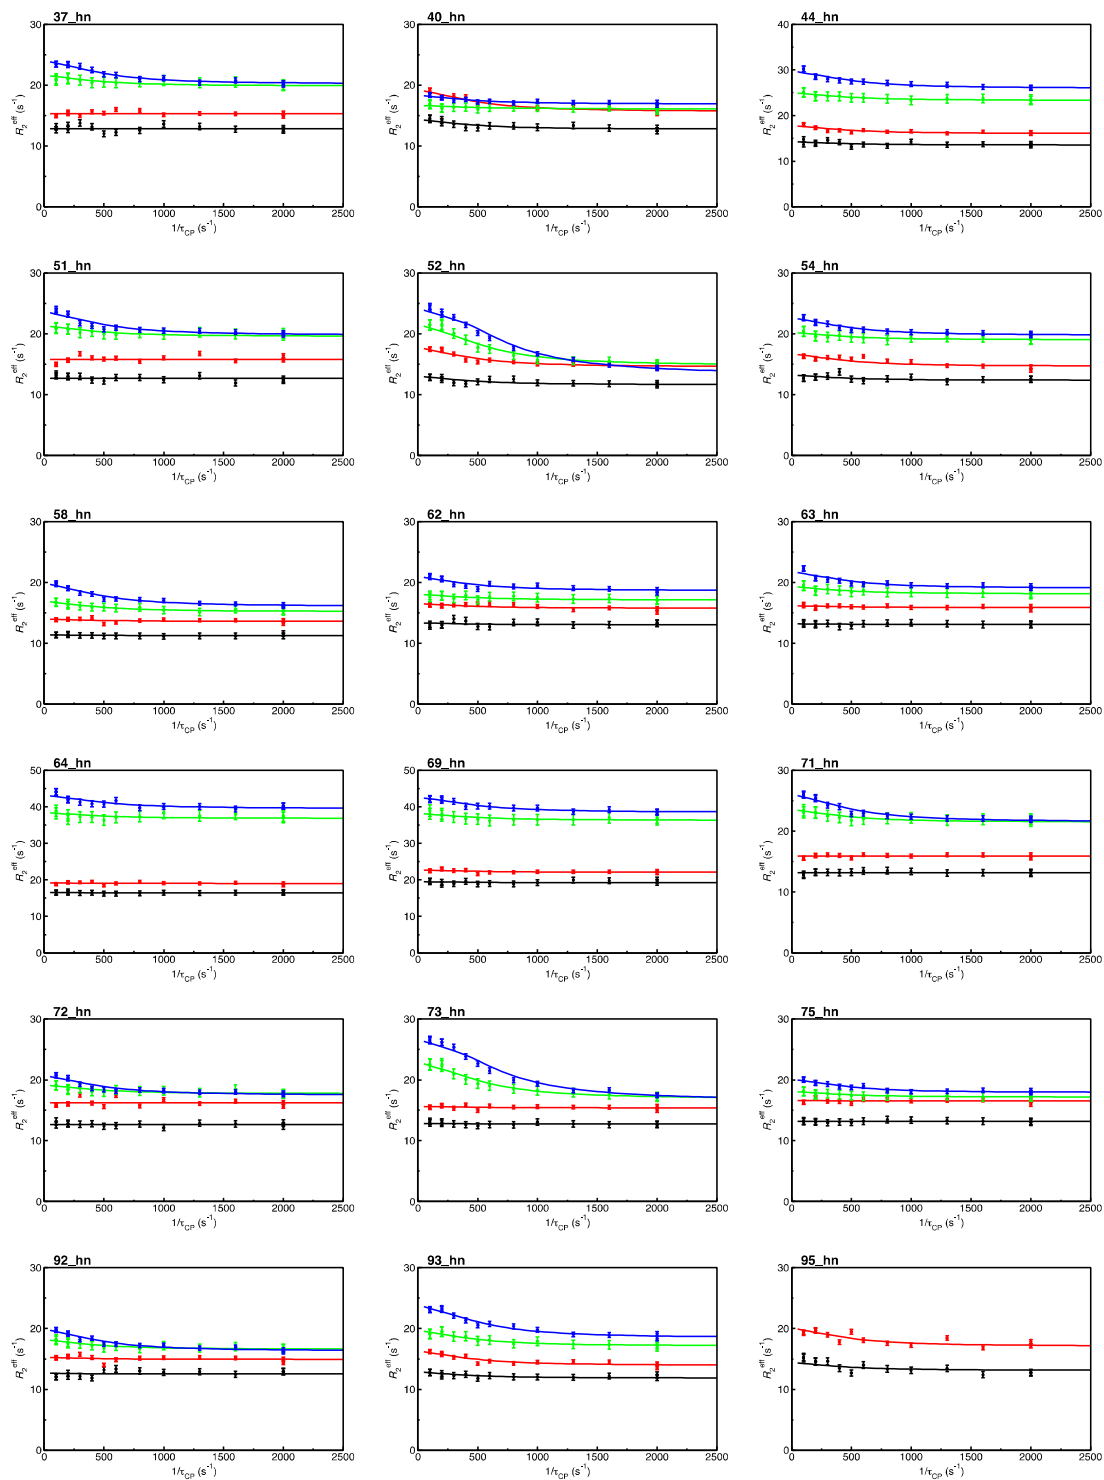

**Figure S3 (Continued).**  $R_2$  relaxation dispersion profiles for the WT E:THF:NADP<sup>+</sup> complex at 300 K, pH 7.6.



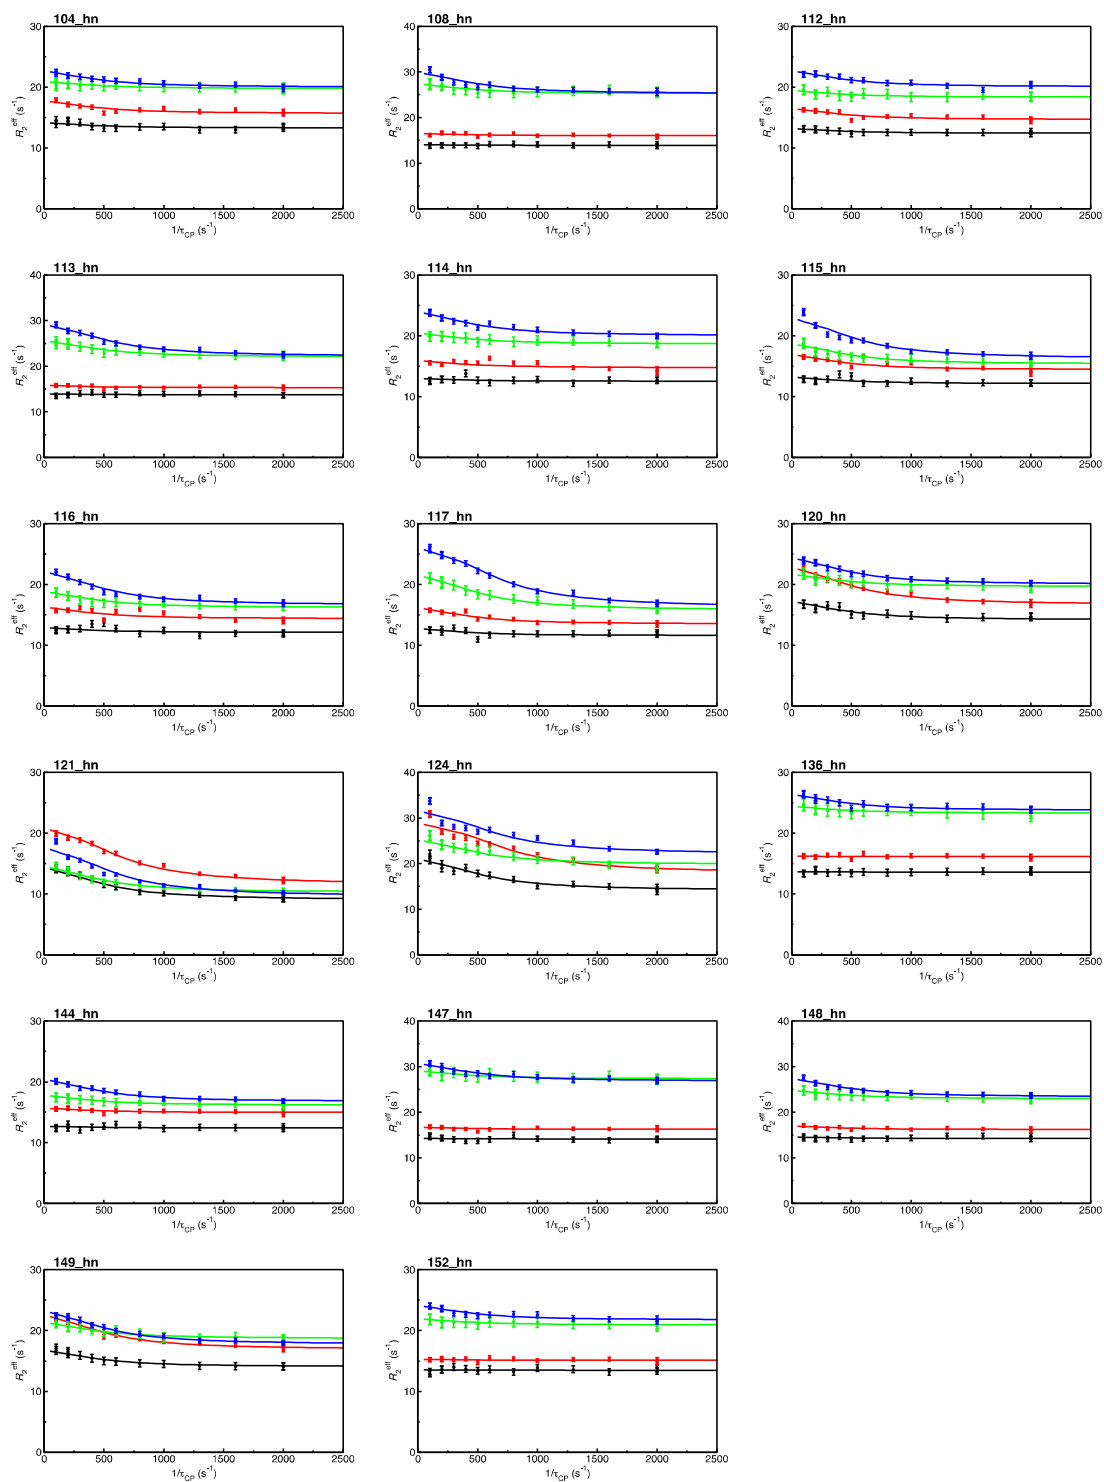

**Figure S3 (Continued).**  $R_2$  relaxation dispersion profiles for the WT E:THF:NAD<sup>+</sup> complex at 300 K, pH 7.6.

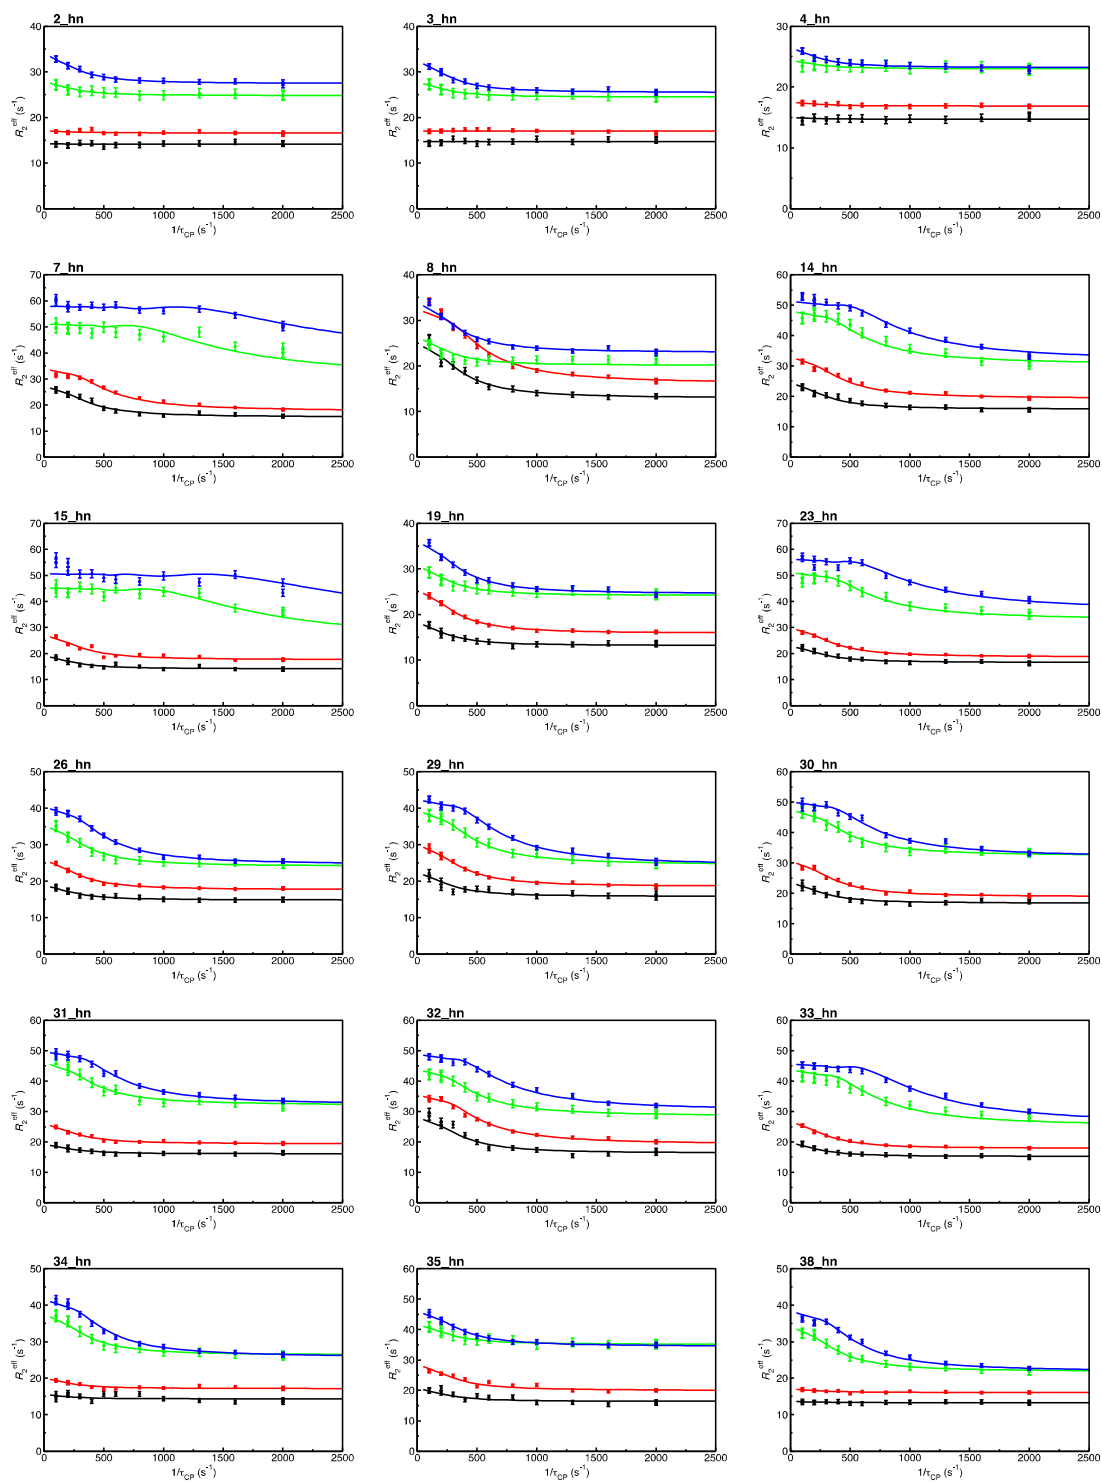

**Figure S4.**  $R_2$  relaxation dispersion profiles for the L28F E:THF:NADPH complex at 300 K, pH 7.6. Black and red, amide  $^{15}\text{N}$  dispersion data at 11.7 and 18.8 T, respectively. Green and blue, amide  $^1\text{H}$  dispersion data at 11.7 (500 MHz) and 18.8 T (800 MHz), respectively. Solid lines indicate the best fit of the data to a global two-site exchange model.

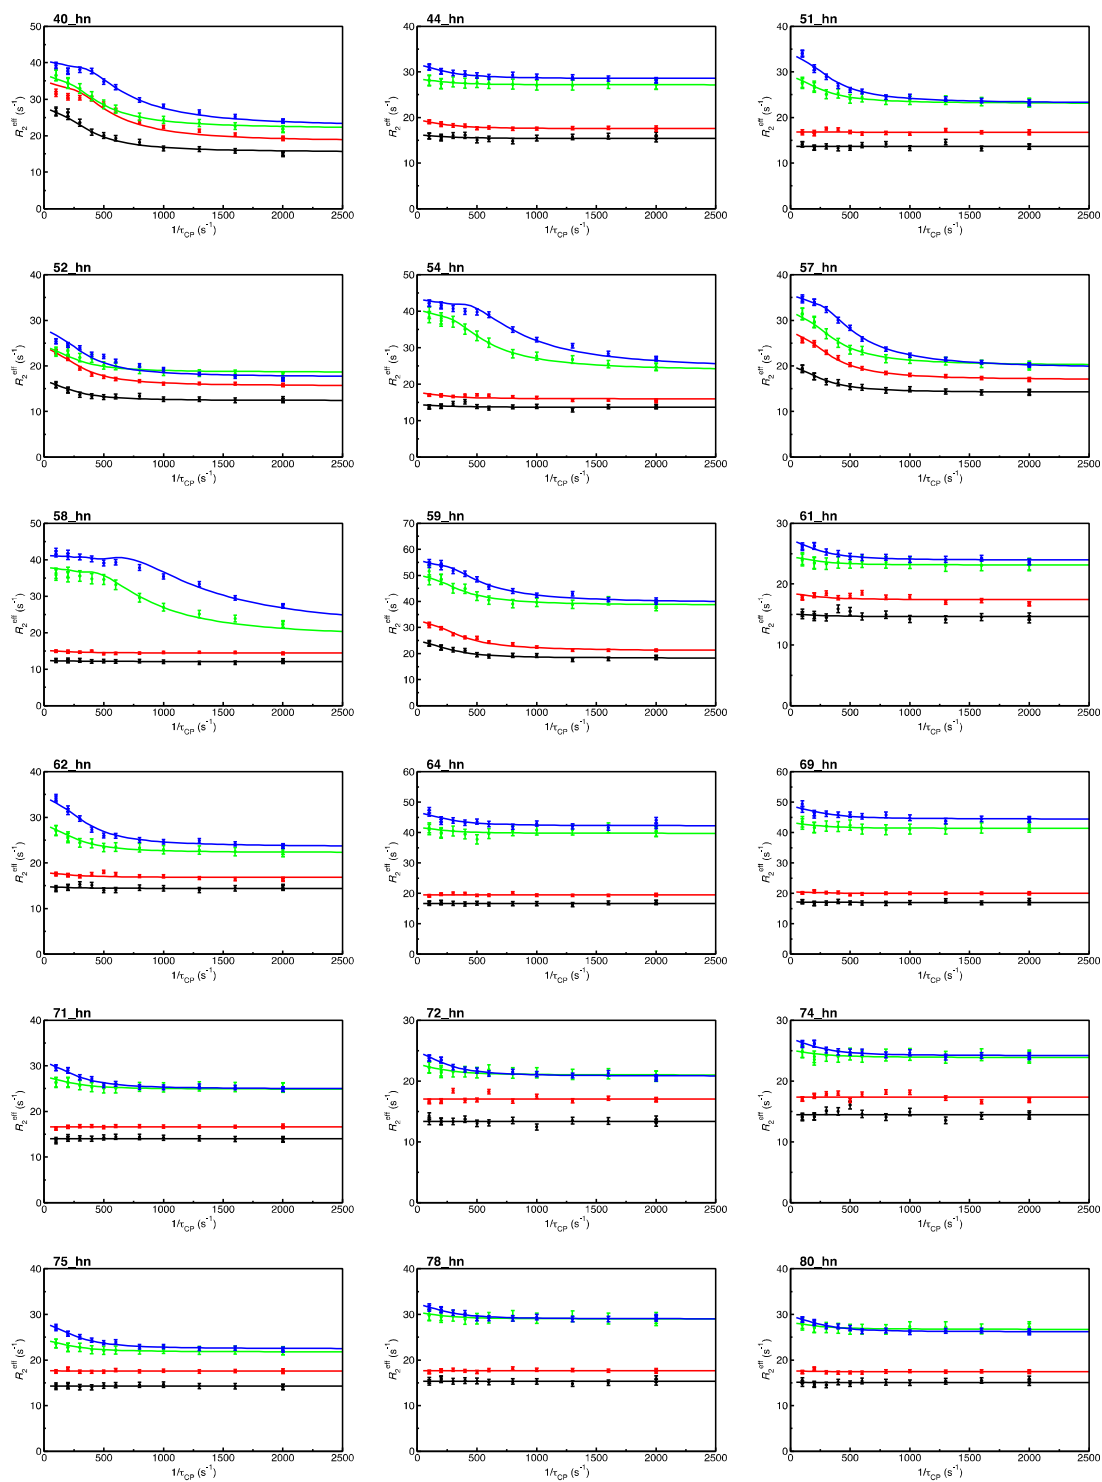

**Figure S4 (Continued).**  $R_2$  relaxation dispersion profiles for the L28F E:THF:NADPH complex at 300 K, pH 7.6.

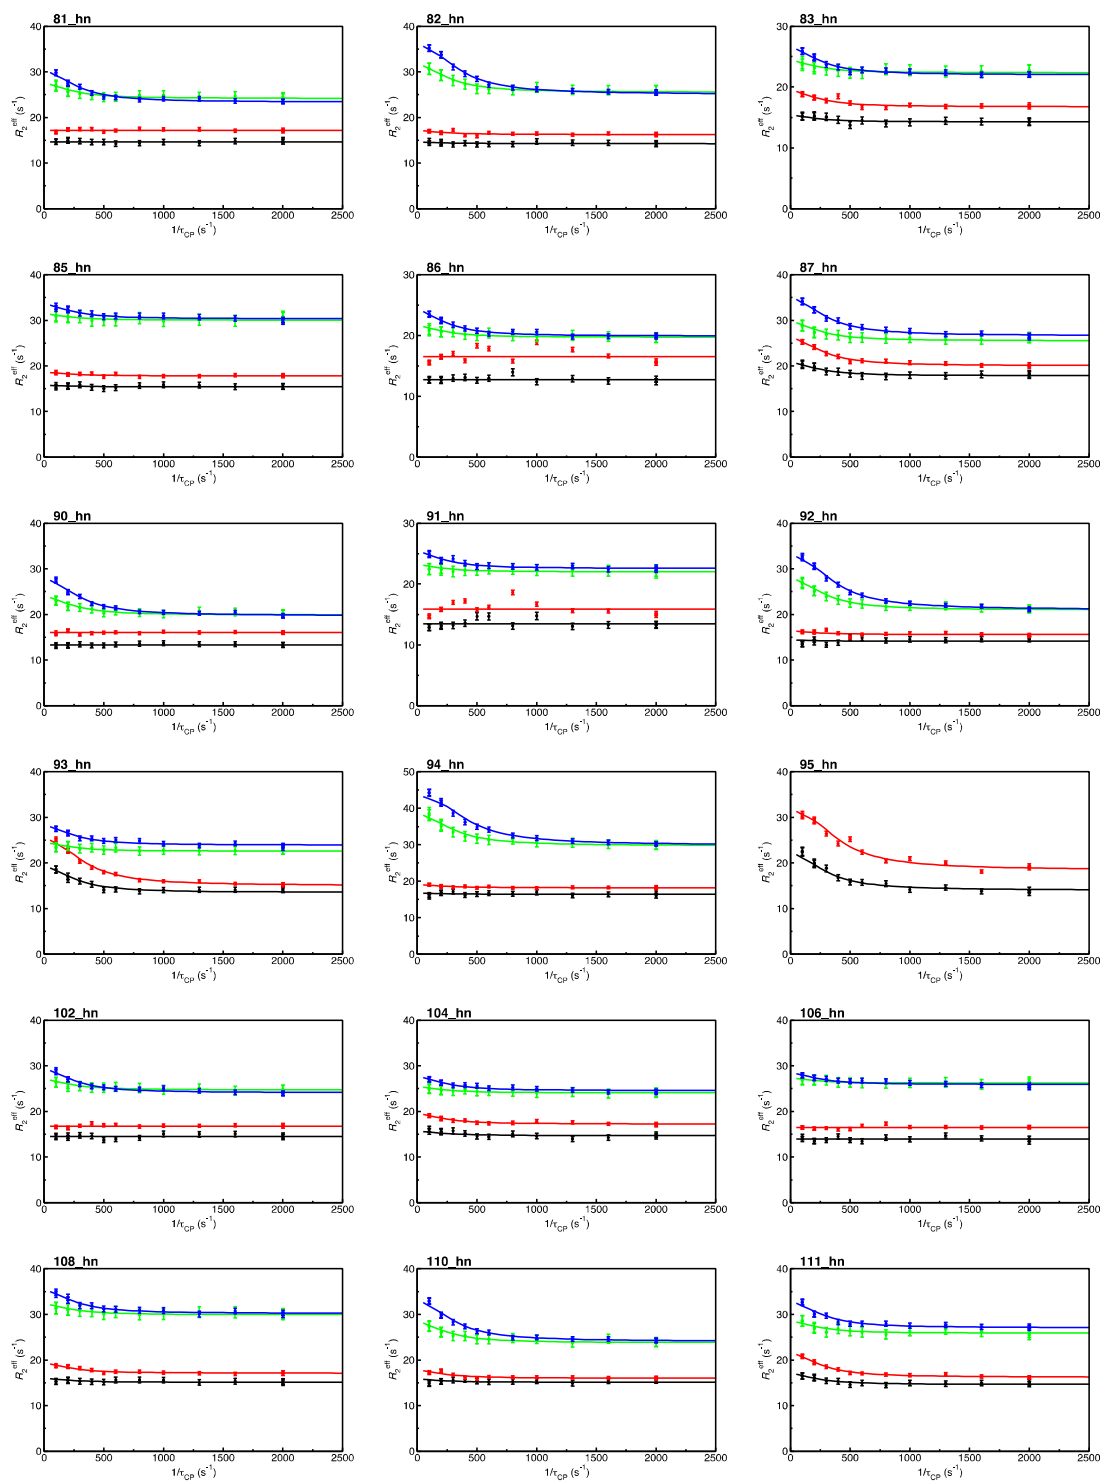

**Figure S4 (Continued).**  $R_2$  relaxation dispersion profiles for the L28F E:THF:NADPH complex at 300 K, pH 7.6.

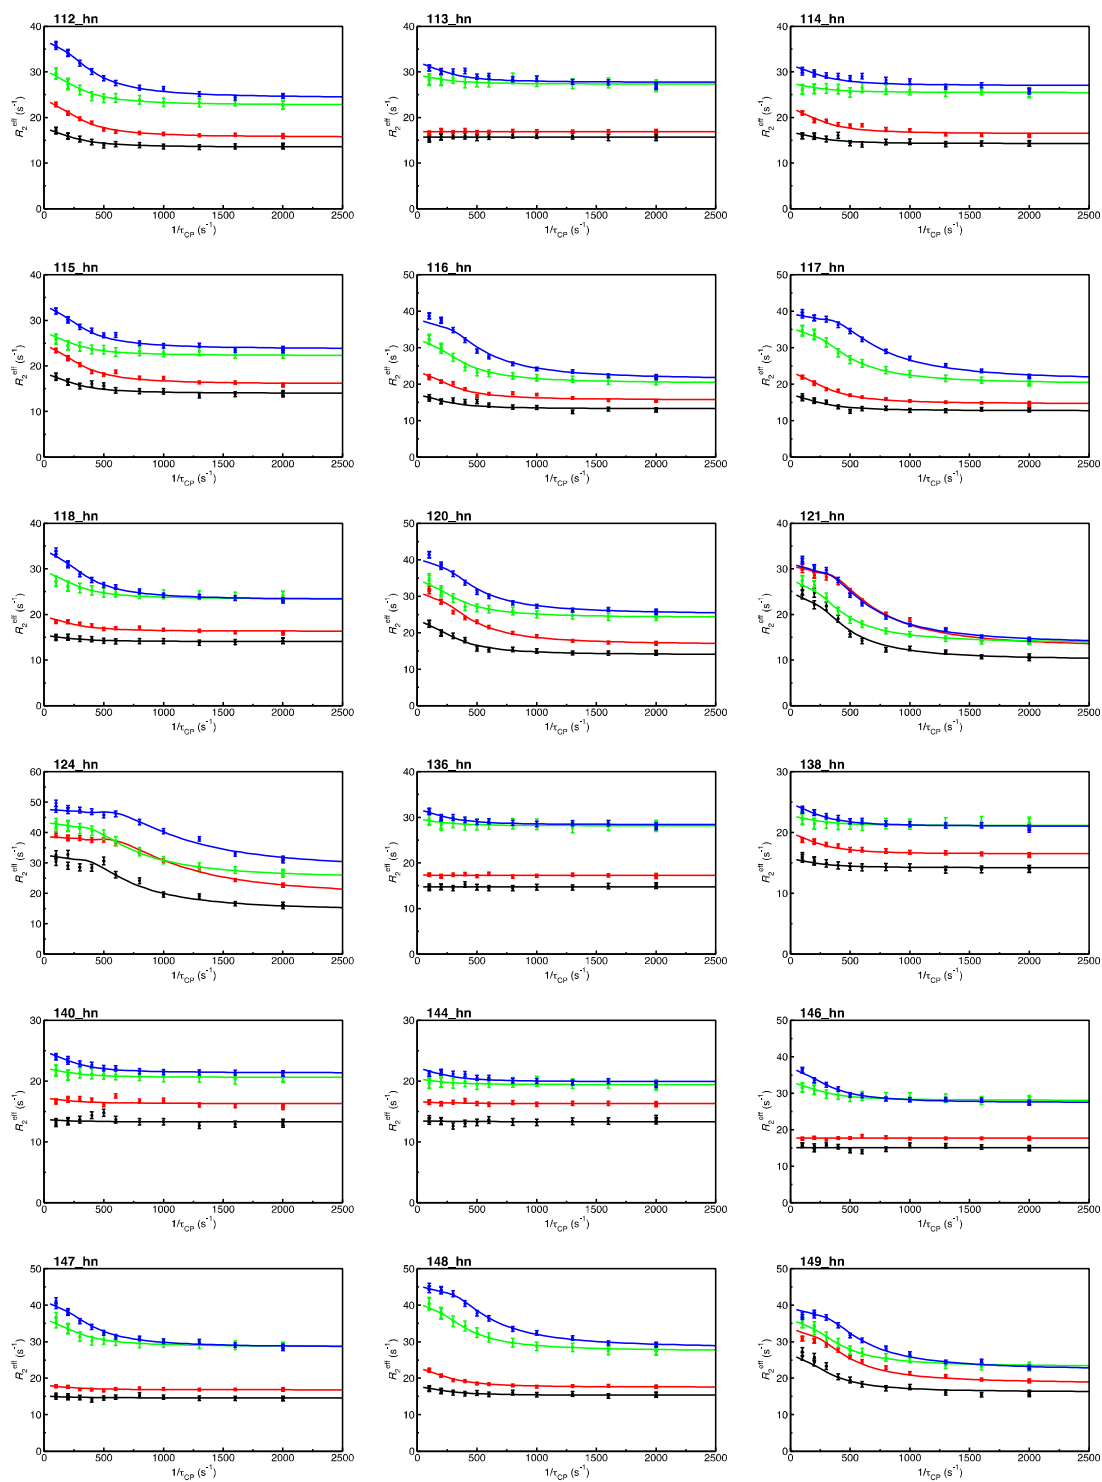

**Figure S4 (Continued).**  $R_2$  relaxation dispersion profiles for the L28F E:THF:NADPH complex at 300 K, pH 7.6.

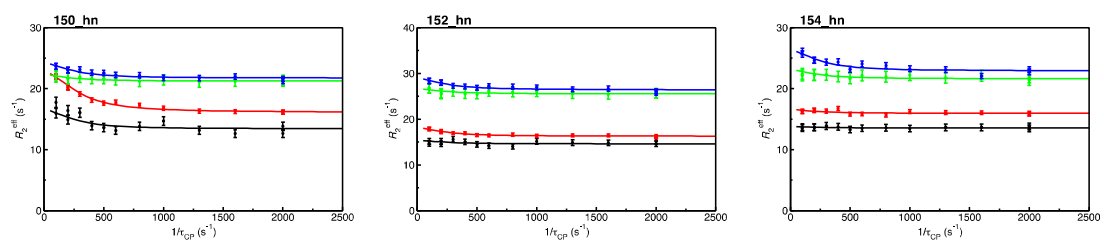

**Figure S4 (Continued).**  $R_2$  relaxation dispersion profiles for the L28F E:THF:NADPH complex at 300 K, pH 7.6.

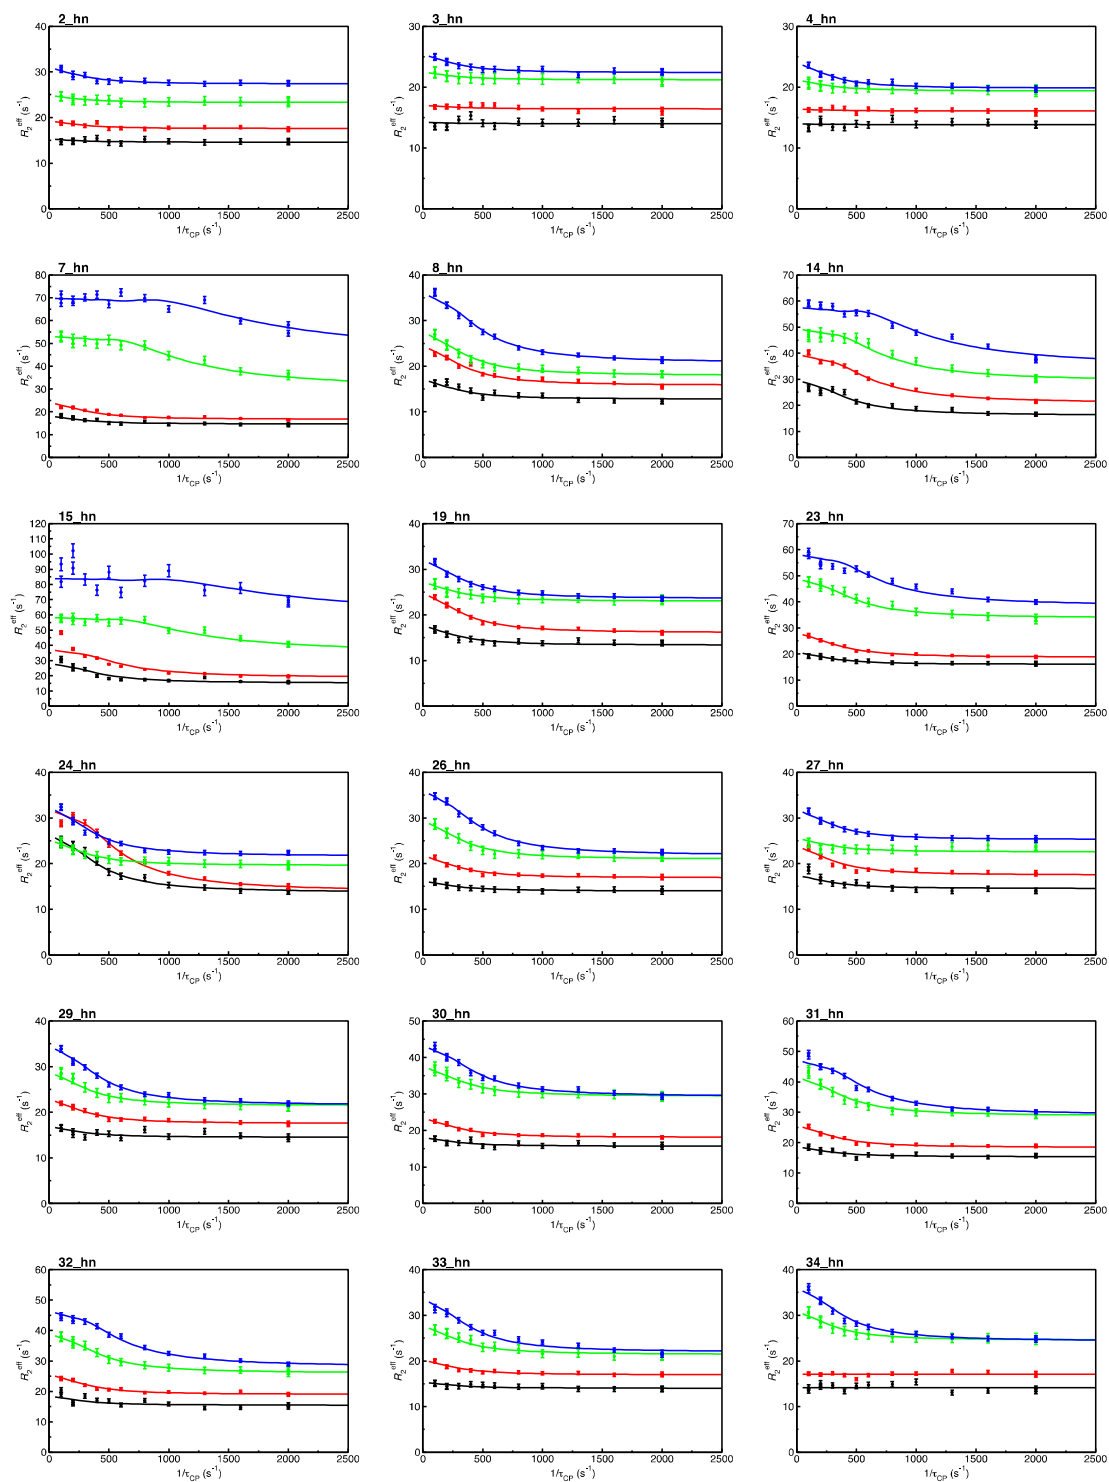

**Figure S5.**  $R_2$  relaxation dispersion profiles for the L28F E:THF:NADP<sup>+</sup> complex at 300 K, pH 7.6. Black and red, amide <sup>15</sup>N dispersion data at 11.7 and 18.8 T, respectively. Green and blue, amide <sup>1</sup>H dispersion data at 11.7 (500 MHz) and 18.8 T (800 MHz), respectively. Solid lines indicate the best fit of the data to a global two-site exchange model.

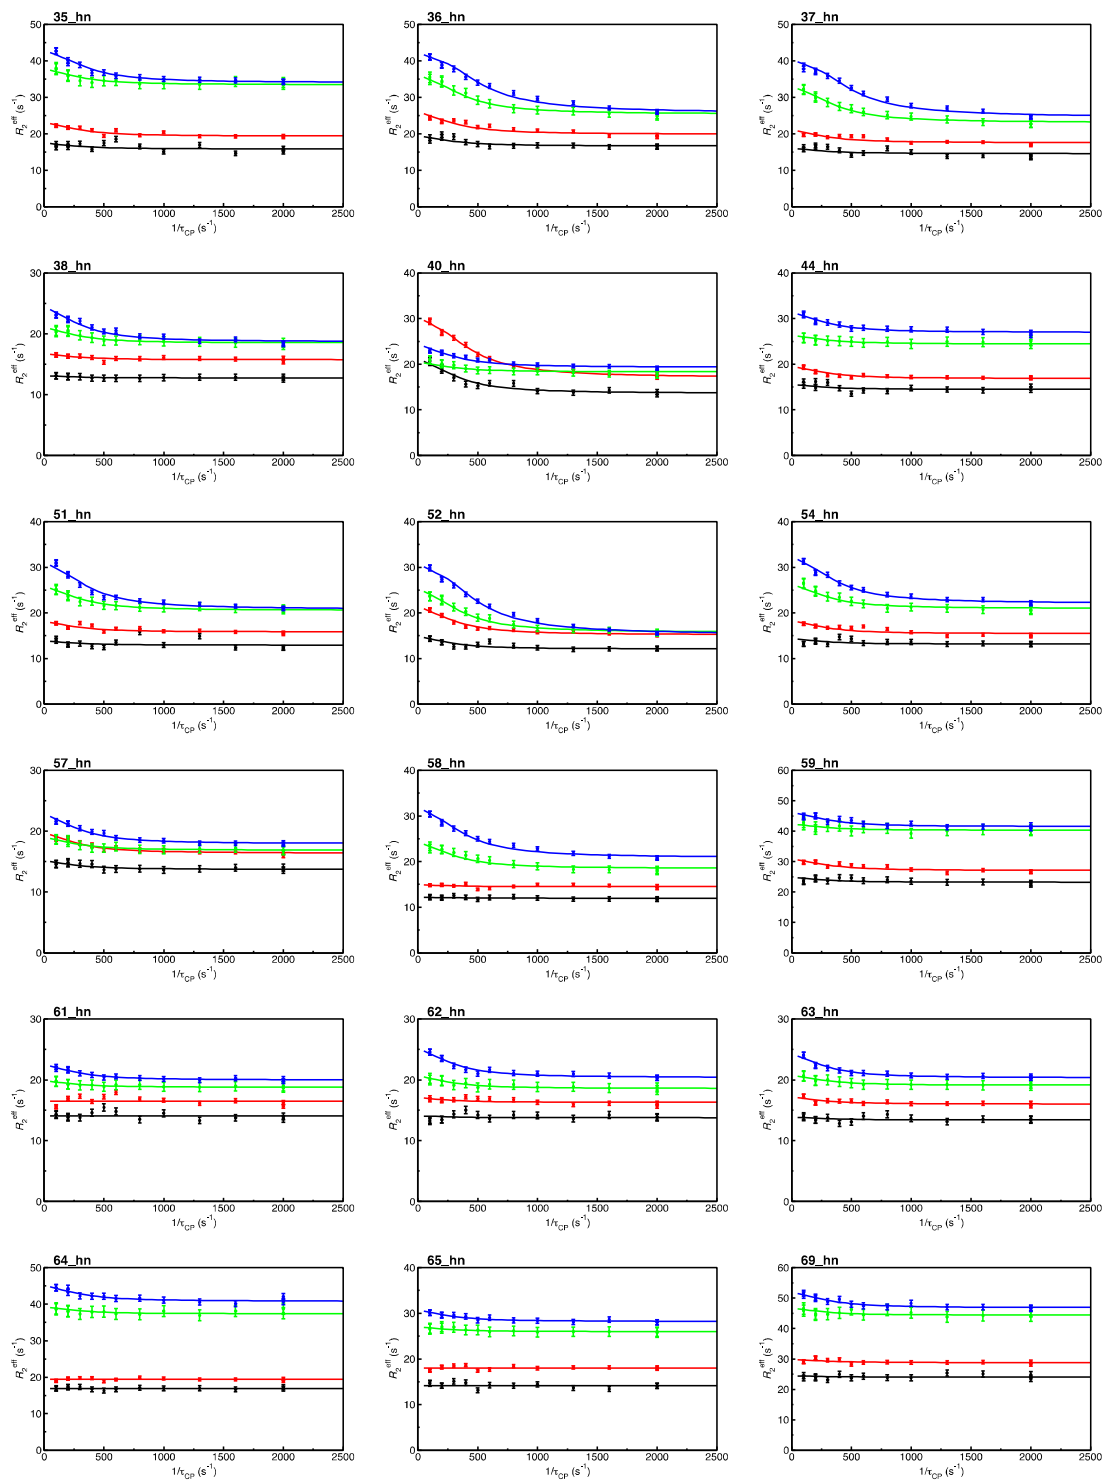

**Figure S5 (Continued).**  $R_2$  relaxation dispersion profiles for the L28F E:THF:NADP<sup>+</sup> complex at 300 K, pH 7.6.



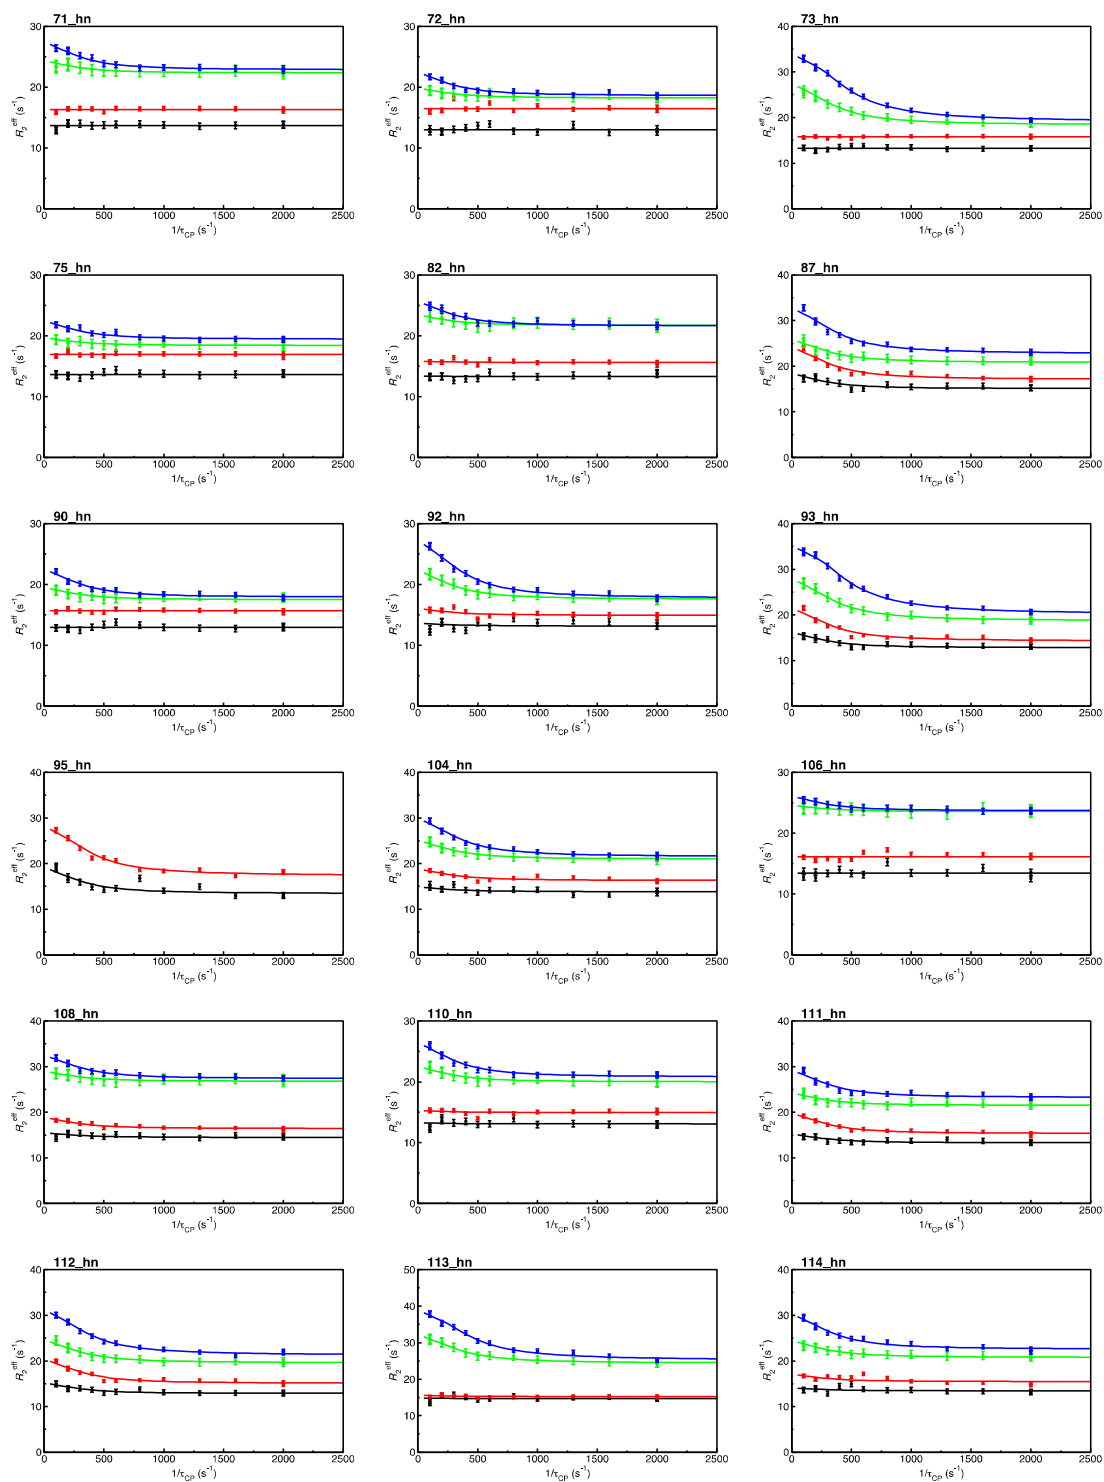

**Figure S5 (Continued).**  $R_2$  relaxation dispersion profiles for the L28F E:THF:NAD<sup>+</sup> complex at 300 K, pH 7.6.

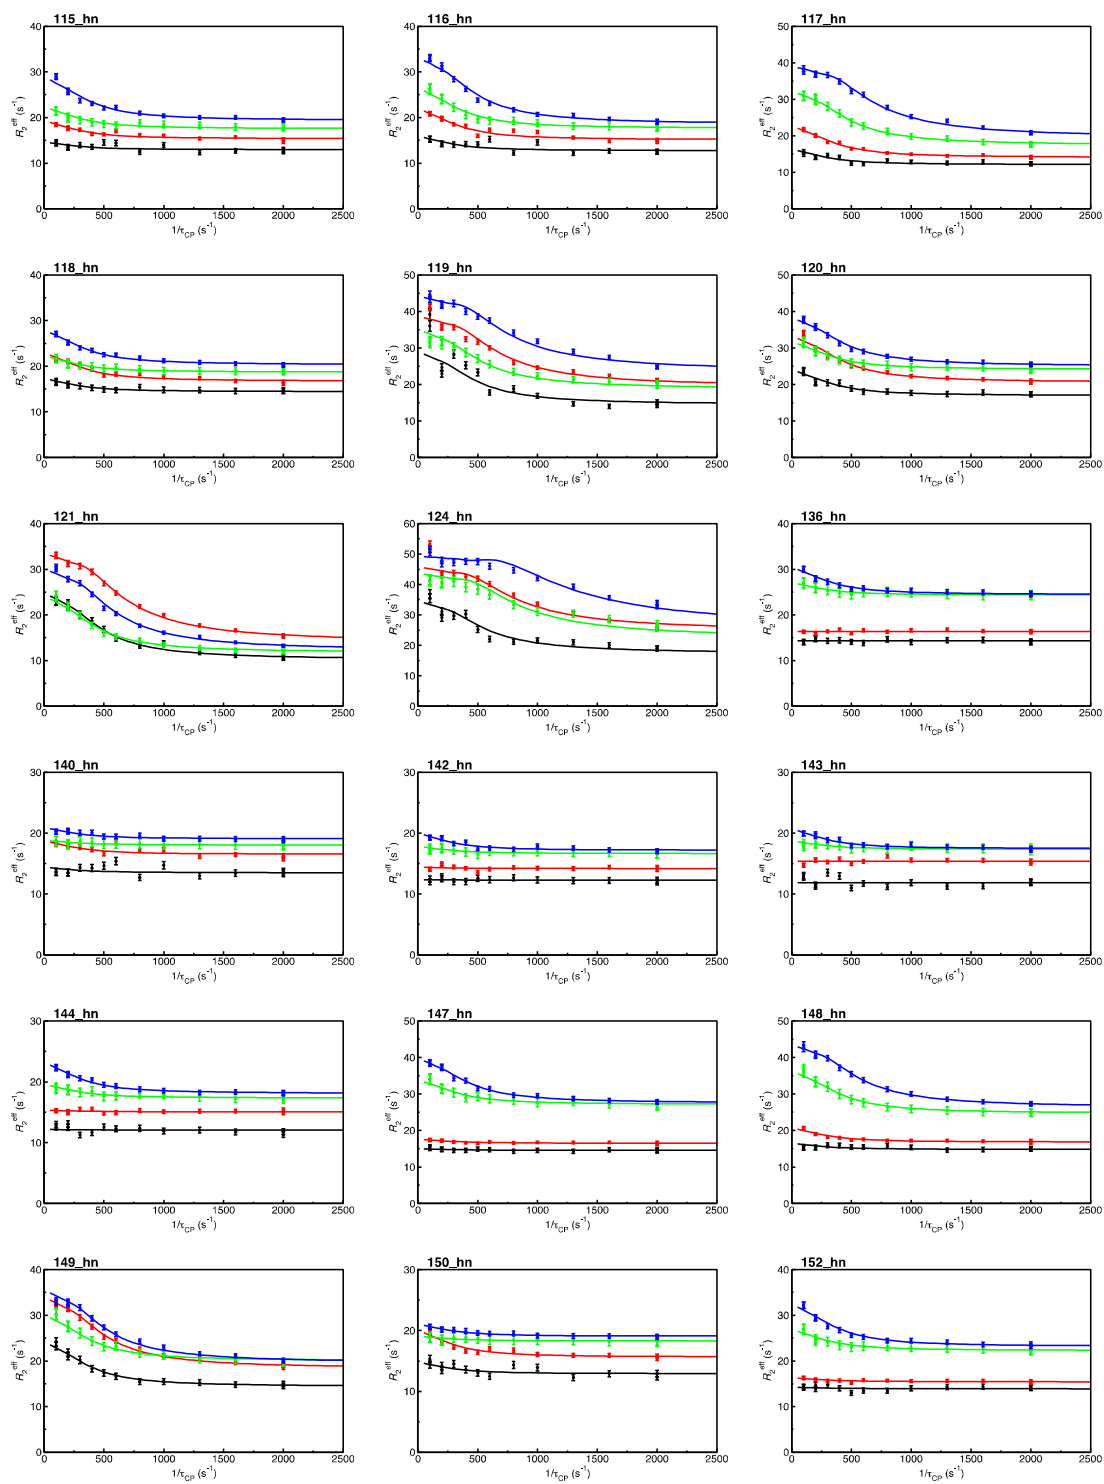

Figure S5 (Continued).  $R_2$  relaxation dispersion profiles for the L28F E:THF:NAD<sup>+</sup> complex at 300 K, pH 7.6.

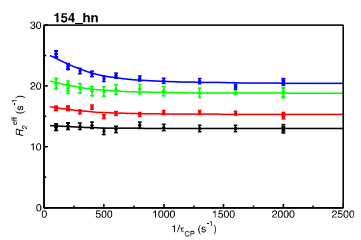

**Figure S5 (Continued).** R<sub>2</sub> relaxation dispersion profiles for the L28F E:THF:NADP<sup>+</sup> complex at 300 K, pH 7.6.

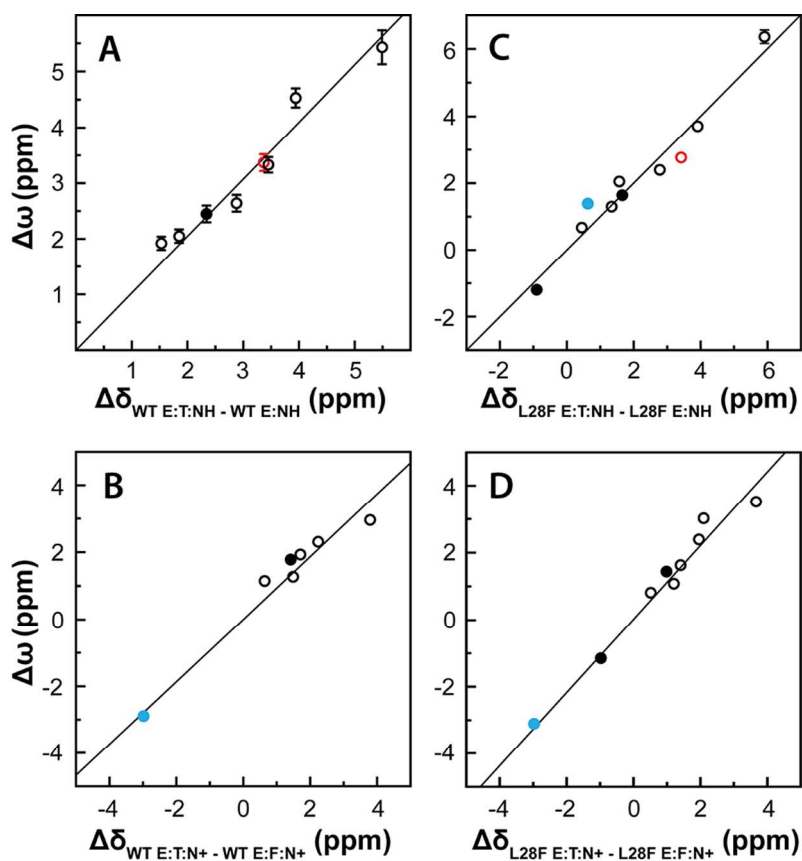

**Figure S6.** Correlations between the dynamic chemical shift differences  $\Delta\omega_N$  and equilibrium chemical shift differences ( $\Delta\delta_N$ ) for a subset of residues that have been identified as markers for the occluded-to-closed transition (N23, L24, I94, G95, I115, D116, E118, G121, H124, and H149; black) and markers for binding of the nicotinamide ring in the active site (A7; red, and G15; cyan). The equilibrium shift differences ( $\Delta\delta_N$ ) are the differences in chemical shift between the occluded E:THF:NADPH or E:THF:NADP<sup>+</sup> complexes and the closed E:NADPH or E:FOL:NADP<sup>+</sup> complexes, respectively. Filled symbols represent residues for which the sign of  $\Delta\omega_N$  could be determined from the HMQC-HSQC experiment; otherwise the absolute value of  $\Delta\omega_N$  is plotted. Lines of best fit obtained by linear regression through the origin are shown for A. the WT E:THF:NADPH complex (slope =  $1.02 \pm 0.02$ ,  $R^2 = 0.95$ ), B. the WT E:THF:NADP<sup>+</sup> complex (slope =  $0.93 \pm 0.04$ ,  $R^2 = 0.95$ ), C. the L28F E:THF:NADPH complex (slope =  $1.00 \pm 0.02$ ,  $R^2 = 0.95$ ), D. the L28F E:THF:NADP<sup>+</sup> complex (slope =  $1.10 \pm 0.03$ ,  $R^2 = 0.97$ ).

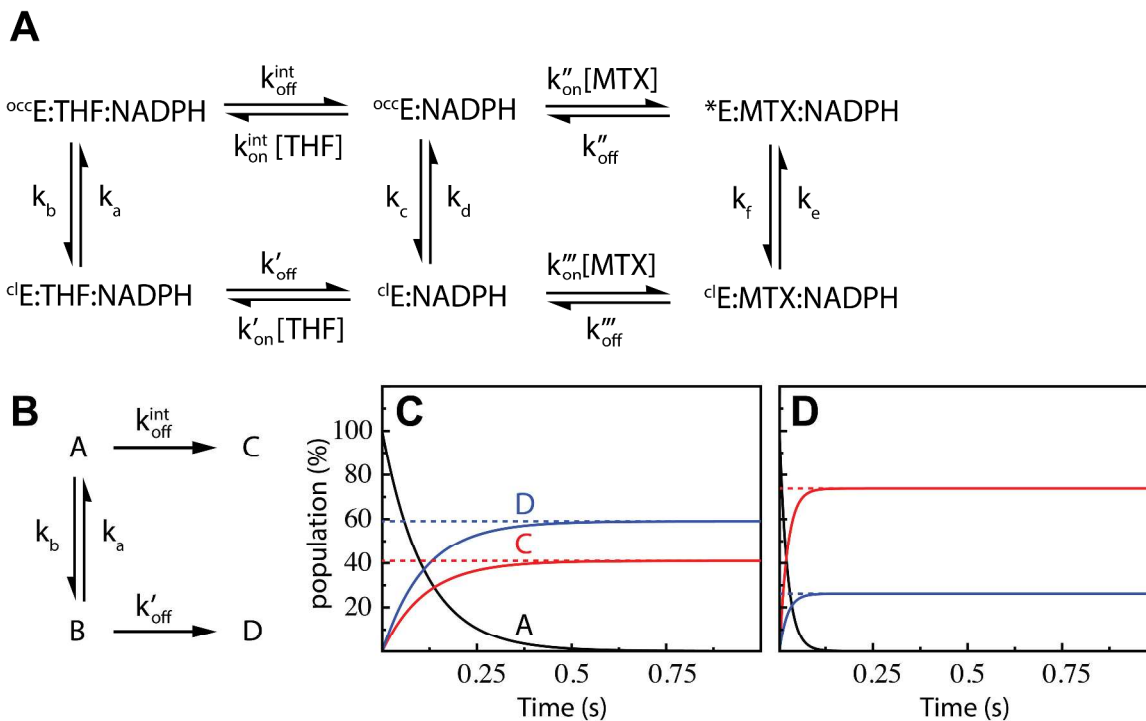

**Figure S7.** A) Expanded kinetic scheme for stopped-flow competition experiments; each enzyme species exchanges between a major and a minor conformational substate. The asterisk denotes the minor occluded conformational substate for the E:MTX:NADPH complex. B) Simplified kinetic scheme for stopped-flow competition experiments under the condition where a large excess of MTX is used. Simulations of this kinetic scheme were performed with Tenua (freely available from bilite.com/tenua) using the kinetic rates determined in the present work. The presence of a small population of state B present at the start of the competition experiment does not significantly alter the observed rate constant. C) Simulated progress curves (A: black, C: red, D: blue) for the WT E:THF:NADPH complex confirm the observed dissociation rate of  $9 \text{ s}^{-1}$  and the 41%/59% partitioning ratio for the intrinsic and allosteric pathway respectively. D) Simulated progress curves (A: black, C: red, D: blue) for the L28F E:THF:NADPH complex confirm the observed dissociation rate of  $48 \text{ s}^{-1}$  and the 75%/25% partitioning ratio for the intrinsic and allosteric pathway respectively. The progress curve for B is not displayed in the figure since its population remains well below 5%.

**Table S1.** Data collection and refinement statistics

|                                                         | WT ecDHFR:THF:NADP <sup>+</sup>               | L28F ecDHFR:THF:NADP <sup>+</sup>             |
|---------------------------------------------------------|-----------------------------------------------|-----------------------------------------------|
| <b>Data collection</b>                                  |                                               |                                               |
| Beamline                                                | SSRL BL11-1                                   | SSRL BL11-1                                   |
| Wavelength (Å)                                          | 0.97945                                       | 0.97945                                       |
| Space group                                             | P2 <sub>1</sub> 2 <sub>1</sub> 2 <sub>1</sub> | P2 <sub>1</sub> 2 <sub>1</sub> 2 <sub>1</sub> |
| Cell dimensions                                         |                                               |                                               |
| <i>a, b, c</i> (Å)                                      | 34.13, 58.20, 75.21                           | 34.54, 58.25, 79.38                           |
| $\alpha, \beta, \gamma$ (°)                             | 90.00, 90.00, 90.00                           | 90.00, 90.00, 90.00                           |
| Resolution (Å)                                          | 46.03-1.50 (1.53-1.50)*                       | 46.96-1.20 (1.22-1.20)                        |
| <i>R</i> <sub>sym</sub> (%)                             | 7.7 (95.9)                                    | 4.6 (100)                                     |
| <i>R</i> <sub>meas</sub> (%)                            | 7.9 (100)                                     | 4.8 (100)                                     |
| <i>R</i> <sub>pim</sub> (%)                             | 2.3 (38.3)                                    | 1.5 (36.6)                                    |
| CC <sub>1/2</sub> (%)                                   | 90.2 (50.3)                                   | 93.5 (76.3)                                   |
| <i>I</i> / $\sigma I$                                   | 33.1 (1.9)                                    | 43.8 (2.0)                                    |
| Total reflections                                       | 278,485                                       | 616,803                                       |
| Unique reflections                                      | 24,646 (1,160)                                | 50,682 (2,468)                                |
| Completeness (%)                                        | 99.6 (96.8)                                   | 99.2 (98.6)                                   |
| Redundancy                                              | 11.3 (6.8)                                    | 12.2 (12.2)                                   |
| <b>Refinement</b>                                       |                                               |                                               |
| Resolution (Å)                                          | 46.03-1.50                                    | 46.96-1.20                                    |
| Reflections (work/free)                                 | 23,341/1,253                                  | 48,045/2,574                                  |
| <i>R</i> <sub>work</sub> / <i>R</i> <sub>free</sub> (%) | 17.1/23.8                                     | 15.5/19.6                                     |
| No. atoms                                               |                                               |                                               |
| Protein                                                 | 1304                                          | 1397                                          |
| Ligands                                                 | 80                                            | 128                                           |
| Water                                                   | 134                                           | 239                                           |
| <i>B</i> -factors                                       |                                               |                                               |
| Protein                                                 | 30.1                                          | 20.4                                          |
| Ligands                                                 | 36.4                                          | 24.4                                          |
| Water                                                   | 35.7                                          | 33.0                                          |
| R.m.s. deviations                                       |                                               |                                               |
| Bond lengths (Å)                                        | 0.011                                         | 0.009                                         |
| Bond angles (°)                                         | 1.34                                          | 1.32                                          |
| Ramachandran plot distribution from MolProbity          |                                               |                                               |
| Favored (%)                                             | 96.95                                         | 98.31                                         |
| Allowed (%)                                             | 3.05                                          | 1.13                                          |
| Outliers (%)                                            | 0.00                                          | 0.56                                          |

\*Values in parentheses are for highest-resolution shell.

**Table S2.** Fitted values of  $R_{ex}$  (at 18.8 T) and  $|\Delta\omega_N|$  for amide  $^{15}\text{N}$  probes in the WT E:THF:NADPH complex. Residues with  $R_{ex}$  smaller than  $2\text{ s}^{-1}$  are omitted. The  $X^2$  per degree of freedom (DoF) is calculated from the combined fit of  $^{15}\text{N}$  and  $^1\text{H}$  amide dispersion data to the global  $k_{ex}$  and  $p_b$ , except for Gly95 where only  $^{15}\text{N}$  data are available. The equilibrium shift difference  $\Delta\delta_N$  is calculated as the difference in  $^{15}\text{N}$  chemical shift between the WT E:THF:NADPH and WT E:NADPH complexes. The  $^{15}\text{N}$  and  $^1\text{H}$  resonances of Ile14 have not been assigned for the WT E:NADPH complex, hence the  $\Delta\delta_N$  is unavailable for that residue.

| <b>Residue</b> | <b><math>R_{ex}</math> (<math>\text{s}^{-1}</math>)</b> | <b><math> \Delta\omega_N </math> (ppm)</b> | <b>error (ppm)</b> | <b>sign</b> | <b><math>X^2/\text{DoF}</math></b> | <b><math>\Delta\delta_N</math> (ppm)</b> |
|----------------|---------------------------------------------------------|--------------------------------------------|--------------------|-------------|------------------------------------|------------------------------------------|
| <b>Ala7</b>    | 5.65                                                    | 3.37                                       | 0.15               | ND          | 0.85                               | -3.37                                    |
| <b>Leu8</b>    | 6.19                                                    | 3.66                                       | 0.20               | ND          | 0.66                               | 1.65                                     |
| <b>Ile14</b>   | 4.05                                                    | 2.59                                       | 0.13               | ND          | 0.41                               | N/A                                      |
| <b>Asn23</b>   | 3.74                                                    | 2.45                                       | 0.15               | +           | 0.19                               | 2.34                                     |
| <b>Leu24</b>   | 5.58                                                    | 3.33                                       | 0.14               | ND          | 0.20                               | -3.45                                    |
| <b>Asp27</b>   | 2.32                                                    | 1.80                                       | 0.15               | ND          | 0.26                               | 2.51                                     |
| <b>Trp30</b>   | 3.94                                                    | 2.54                                       | 0.14               | ND          | 0.43                               | 1.95                                     |
| <b>Lys32</b>   | 4.56                                                    | 2.83                                       | 0.16               | ND          | 0.49                               | 2.17                                     |
| <b>Arg33</b>   | 2.40                                                    | 1.84                                       | 0.15               | ND          | 0.36                               | 0.86                                     |
| <b>Leu36</b>   | 5.98                                                    | 3.54                                       | 0.19               | ND          | 0.33                               | -2.35                                    |
| <b>Asn37</b>   | 4.67                                                    | 2.88                                       | 0.13               | ND          | 0.94                               | -2.11                                    |
| <b>Val40</b>   | 5.10                                                    | 3.09                                       | 0.17               | ND          | 0.31                               | 2.68                                     |
| <b>Asn59</b>   | 2.49                                                    | 1.88                                       | 0.20               | ND          | 0.35                               | 1.32                                     |
| <b>Val93</b>   | 2.01                                                    | 1.65                                       | 0.13               | ND          | 0.28                               | -1.60                                    |
| <b>Gly95</b>   | 2.87                                                    | 2.05                                       | 0.12               | ND          | 1.95                               | 1.85                                     |
| <b>Tyr111</b>  | 2.00                                                    | 1.65                                       | 0.14               | ND          | 0.79                               | -0.47                                    |
| <b>Ile115</b>  | 2.58                                                    | 1.92                                       | 0.12               | ND          | 1.26                               | 1.53                                     |
| <b>Glu120</b>  | 5.83                                                    | 3.47                                       | 0.18               | ND          | 0.18                               | 1.84                                     |
| <b>Gly121</b>  | 7.59                                                    | 4.53                                       | 0.17               | ND          | 0.64                               | 3.94                                     |
| <b>His124</b>  | 8.69                                                    | 5.43                                       | 0.30               | ND          | 0.58                               | -5.49                                    |
| <b>His149</b>  | 4.15                                                    | 2.64                                       | 0.15               | ND          | 0.52                               | 2.88                                     |

**Table S3.** Fitted values of  $R_{ex}$  (at 18.8 T, 800 MHz) and  $|\Delta\omega_H|$  for amide  $^1H$  probes in the WT E:THF:NADPH complex. Residues with  $R_{ex}$  smaller than  $2\text{ s}^{-1}$  are omitted. The  $X^2$  per degree of freedom (DoF) is calculated from the combined fit of  $^{15}N$  and  $^1H$  amide dispersion data to the global  $k_{ex}$  and  $p_b$ . The equilibrium shift difference  $\Delta\delta_H$  is calculated as the difference in amide  $^1H$  chemical shift between the WT E:THF:NADPH and WT E:NADPH complexes. The  $^{15}N$  and  $^1H$  resonances of Ile14 and Lys38 have not been assigned for the WT E:NADPH complex, hence  $\Delta\delta_H$  is unavailable for those residues.

| Residue | $R_{ex}$ ( $s^{-1}$ ) | $ \Delta\omega_H $ (ppm) | error (ppm) | $X^2/DoF$ | $\Delta\delta_H$ (ppm) |
|---------|-----------------------|--------------------------|-------------|-----------|------------------------|
| Ile5    | 3.48                  | 0.24                     | 0.02        | 0.20      | 0.12                   |
| Ala7    | 12.28                 | 1.56                     | 0.09        | 0.85      | -1.95                  |
| Leu8    | 5.00                  | 0.31                     | 0.03        | 0.66      | -0.05                  |
| Ile14   | 9.00                  | 0.58                     | 0.06        | 0.41      | N/A                    |
| Gly15   | 12.17                 | 1.45                     | 0.11        | 1.81      | 1.57                   |
| Met16   | 5.23                  | 0.32                     | 0.02        | 0.60      | 0.04                   |
| Ala19   | 2.78                  | 0.20                     | 0.02        | 0.36      | 0.05                   |
| Asn23   | 8.57                  | 0.54                     | 0.10        | 0.19      | 0.69                   |
| Ala26   | 4.60                  | 0.29                     | 0.02        | 0.26      | -0.34                  |
| Asp27   | 2.64                  | 0.20                     | 0.02        | 0.26      | -0.41                  |
| Ala29   | 5.23                  | 0.32                     | 0.02        | 0.57      | 0.36                   |
| Trp30   | 4.92                  | 0.30                     | 0.03        | 0.43      | 0.33                   |
| Phe31   | 2.02                  | 0.17                     | 0.03        | 0.23      | 0.14                   |
| Lys32   | 2.38                  | 0.19                     | 0.02        | 0.49      | 0.41                   |
| Arg33   | 7.74                  | 0.47                     | 0.03        | 0.36      | 0.49                   |
| Asn34   | 4.14                  | 0.27                     | 0.02        | 0.85      | 0.20                   |
| Thr35   | 2.32                  | 0.18                     | 0.03        | 1.03      | 0.07                   |
| Leu36   | 7.76                  | 0.47                     | 0.04        | 0.33      | 0.53                   |
| Asn37   | 5.48                  | 0.33                     | 0.03        | 0.94      | -0.47                  |
| Lys38   | 3.98                  | 0.26                     | 0.02        | 0.34      | N/A                    |
| Val40   | 5.09                  | 0.31                     | 0.02        | 0.31      | 0.20                   |
| Arg44   | 2.04                  | 0.17                     | 0.02        | 0.35      | -0.03                  |
| Gly51   | 3.25                  | 0.23                     | 0.02        | 1.15      | -0.08                  |
| Leu54   | 6.08                  | 0.36                     | 0.03        | 0.32      | -0.43                  |
| Arg57   | 4.03                  | 0.26                     | 0.02        | 0.20      | 0.03                   |
| Lys58   | 8.15                  | 0.50                     | 0.04        | 0.25      | -0.54                  |
| Asn59   | 2.62                  | 0.20                     | 0.04        | 0.35      | 0.10                   |
| Leu62   | 2.17                  | 0.17                     | 0.02        | 0.37      | 0.06                   |
| Ser64   | 4.15                  | 0.27                     | 0.04        | 0.72      | -0.06                  |
| Asp69   | 3.29                  | 0.23                     | 0.04        | 0.42      | -0.05                  |
| Arg71   | 3.45                  | 0.23                     | 0.02        | 0.49      | -0.07                  |
| Val72   | 2.88                  | 0.21                     | 0.02        | 1.14      | -0.07                  |
| Val75   | 2.46                  | 0.19                     | 0.02        | 0.20      | 0.02                   |
| Ile82   | 2.39                  | 0.19                     | 0.02        | 0.20      | 0.06                   |
| Glu90   | 2.11                  | 0.17                     | 0.02        | 0.24      | 0.00                   |
| Met92   | 4.12                  | 0.27                     | 0.02        | 0.70      | 0.05                   |
| Val93   | 2.01                  | 0.17                     | 0.02        | 0.28      | -0.06                  |
| Gly96   | 8.29                  | 0.51                     | 0.07        | 0.60      | 0.46                   |
| Val99   | 4.18                  | 0.27                     | 0.02        | 0.25      | -0.21                  |
| Gln102  | 2.9                   | 0.21                     | 0.02        | 0.55      | 0.00                   |



---

|               |      |      |      |      |       |
|---------------|------|------|------|------|-------|
| <b>Gln108</b> | 3.93 | 0.26 | 0.02 | 0.39 | 0.00  |
| <b>Leu110</b> | 4.00 | 0.26 | 0.02 | 0.50 | 0.04  |
| <b>Tyr111</b> | 4.44 | 0.28 | 0.02 | 0.79 | -0.04 |
| <b>Leu112</b> | 2.62 | 0.20 | 0.02 | 0.25 | 0.03  |
| <b>Thr113</b> | 5.54 | 0.34 | 0.02 | 0.34 | -0.06 |
| <b>His114</b> | 4.04 | 0.26 | 0.02 | 0.62 | -0.07 |
| <b>Ile115</b> | 6.19 | 0.37 | 0.02 | 1.26 | 0.07  |
| <b>Asp116</b> | 4.90 | 0.30 | 0.02 | 1.00 | -0.27 |
| <b>Ala117</b> | 8.08 | 0.50 | 0.04 | 0.75 | 0.34  |
| <b>Glu120</b> | 3.72 | 0.25 | 0.02 | 0.18 | 0.14  |
| <b>Gly121</b> | 5.43 | 0.33 | 0.01 | 0.64 | -0.36 |
| <b>Asp122</b> | 8.35 | 0.52 | 0.06 | 0.24 | -0.53 |
| <b>His124</b> | 9.90 | 0.69 | 0.08 | 0.58 | -0.89 |
| <b>Asp144</b> | 2.28 | 0.18 | 0.02 | 0.22 | 0.00  |
| <b>Asn147</b> | 2.92 | 0.21 | 0.02 | 0.20 | 0.07  |
| <b>Ser148</b> | 2.16 | 0.17 | 0.02 | 0.15 | -0.19 |
| <b>His149</b> | 6.33 | 0.38 | 0.02 | 0.52 | 0.23  |

---

**Table S4.** Fitted values of  $R_{ex}$  (at 18.8 T) and  $|\Delta\omega_N|$  for amide  $^{15}\text{N}$  probes in the WT E:THF:NADP<sup>+</sup> complex. Residues with  $R_{ex}$  smaller than 2 s<sup>-1</sup> are omitted. The  $X^2$  per degree of freedom (DoF) is calculated from the combined fit of  $^{15}\text{N}$  and  $^1\text{H}$  amide dispersion data to the global  $k_{ex}$  and  $p_b$ , except for Gly95 where only  $^{15}\text{N}$  data are available. The equilibrium shift difference  $\Delta\delta_N$  is calculated as the difference in  $^{15}\text{N}$  chemical shift between the WT E:THF:NADP<sup>+</sup> and WT E:FOL:NADP<sup>+</sup> complexes. The  $^{15}\text{N}$  and  $^1\text{H}$  resonances of His124 have not been assigned for the WT E:FOL:NADP<sup>+</sup> complex, hence  $\Delta\delta_N$  is not available for that residue.

| Residue       | $R_{ex}$ (s <sup>-1</sup> ) | $ \Delta\omega_N $ (ppm) | error (ppm) | sign | $X^2/\text{DoF}$ | $\Delta\delta_N$ (ppm) |
|---------------|-----------------------------|--------------------------|-------------|------|------------------|------------------------|
| <b>Leu8</b>   | 4.41                        | 1.69                     | 0.07        | ND   | 0.79             | 0.46                   |
| <b>Ile14</b>  | 8.32                        | 2.75                     | 0.07        | ND   | 1.22             | 3.09                   |
| <b>Gly15</b>  | 8.78                        | 2.89                     | 0.08        | -    | 2.90             | -2.98                  |
| <b>Ala19</b>  | 2.01                        | 1.06                     | 0.07        | ND   | 0.23             | 0.21                   |
| <b>Asn23</b>  | 4.76                        | 1.78                     | 0.08        | +    | 0.45             | 1.42                   |
| <b>Leu24</b>  | 6.79                        | 2.31                     | 0.07        | ND   | 0.91             | -2.24                  |
| <b>Trp30</b>  | 2.87                        | 1.30                     | 0.09        | ND   | 0.49             | 0.61                   |
| <b>Lys32</b>  | 2.65                        | 1.24                     | 0.06        | ND   | 0.43             | -0.37                  |
| <b>Val40</b>  | 3.41                        | 1.44                     | 0.08        | ND   | 0.45             | 1.24                   |
| <b>Arg52</b>  | 2.99                        | 1.33                     | 0.05        | ND   | 0.79             | 0.23                   |
| <b>Val93</b>  | 2.23                        | 1.12                     | 0.07        | ND   | 0.63             | -0.87                  |
| <b>Gly95</b>  | 2.78                        | 1.27                     | 0.08        | ND   | 2.06             | 1.49                   |
| <b>Ile115</b> | 2.33                        | 1.15                     | 0.07        | ND   | 1.68             | 0.64                   |
| <b>Ala117</b> | 2.50                        | 1.20                     | 0.06        | +    | 0.57             | 0.75                   |
| <b>Glu120</b> | 5.84                        | 2.06                     | 0.08        | ND   | 0.29             | 1.94                   |
| <b>Gly121</b> | 8.98                        | 2.96                     | 0.06        | ND   | 1.67             | 3.79                   |
| <b>His124</b> | 10.72                       | 3.59                     | 0.10        | +    | 2.99             | N/A                    |
| <b>His149</b> | 5.35                        | 1.93                     | 0.07        | ND   | 0.27             | 1.71                   |

**Table S5.** Fitted values of  $R_{ex}$  (at 18.8 T, 800 MHz) and  $|\Delta\omega_H|$  for amide  $^1H$  probes in the WT E:THF:NADPH<sup>+</sup> complex. Residues with  $R_{ex}$  smaller than 2 s<sup>-1</sup> are omitted. The  $\chi^2$  per degree of freedom (DoF) is calculated from the combined fit of  $^{15}N$  and  $^1H$  amide dispersion curves to the global  $k_{ex}$  and  $p_b$ . The equilibrium shift difference  $\Delta\delta_H$  is calculated as the difference in amide proton chemical shift between the WT E:THF:NADP<sup>+</sup> and WT E:FOL:NADP<sup>+</sup> complexes. The  $^{15}N$  and  $^1H$  resonances of Ala7 and His124 have not been assigned for the WT E:FOL:NADP<sup>+</sup> complex, hence  $\Delta\delta_H$  is unavailable for those residues.

| Residue | $R_{ex}$ (s <sup>-1</sup> ) | $ \Delta\omega_H $ (ppm) | error (ppm) | $\chi^2/DoF$ | $\Delta\delta_H$ (ppm) |
|---------|-----------------------------|--------------------------|-------------|--------------|------------------------|
| Leu4    | 2.06                        | 0.11                     | 0.01        | 0.46         | -0.08                  |
| Ile5    | 3.05                        | 0.14                     | 0.01        | 0.46         | -0.02                  |
| Ala7    | 16.98                       | 1.36                     | 0.06        | 1.24         | N/A                    |
| Leu8    | 8.13                        | 0.27                     | 0.01        | 0.79         | -0.15                  |
| Ile14   | 9.32                        | 0.31                     | 0.01        | 1.22         | -0.78                  |
| Gly15   | 17.00                       | 1.37                     | 0.07        | 2.90         | 1.36                   |
| Ala19   | 2.15                        | 0.11                     | 0.01        | 0.23         | -0.02                  |
| Asn23   | 7.81                        | 0.26                     | 0.02        | 0.45         | 0.49                   |
| Leu24   | 5.78                        | 0.21                     | 0.01        | 0.91         | -0.13                  |
| Ala26   | 5.50                        | 0.20                     | 0.01        | 0.24         | -0.18                  |
| Ala29   | 5.03                        | 0.19                     | 0.01        | 0.72         | 0.21                   |
| Trp30   | 4.52                        | 0.17                     | 0.01        | 0.49         | 0.19                   |
| Phe31   | 3.63                        | 0.15                     | 0.01        | 0.51         | 0.38                   |
| Lys32   | 3.70                        | 0.15                     | 0.01        | 0.43         | 0.24                   |
| Arg33   | 5.12                        | 0.19                     | 0.01        | 0.28         | 0.28                   |
| Asn34   | 3.37                        | 0.14                     | 0.01        | 0.93         | 0.16                   |
| Thr35   | 2.83                        | 0.13                     | 0.01        | 0.87         | 0.10                   |
| Leu36   | 5.52                        | 0.20                     | 0.01        | 0.26         | 0.21                   |
| Asn37   | 3.65                        | 0.15                     | 0.01        | 0.67         | 0.00                   |
| Arg44   | 3.59                        | 0.15                     | 0.01        | 0.52         | -0.02                  |
| Gly51   | 3.67                        | 0.15                     | 0.01        | 1.25         | 0.15                   |
| Arg52   | 10.67                       | 0.36                     | 0.01        | 0.79         | 0.11                   |
| Leu54   | 2.73                        | 0.13                     | 0.01        | 0.73         | -0.06                  |
| Lys58   | 3.60                        | 0.15                     | 0.01        | 0.43         | 0.01                   |
| Leu62   | 2.15                        | 0.11                     | 0.01        | 0.68         | -0.08                  |
| Ser63   | 2.59                        | 0.12                     | 0.01        | 0.41         | -0.05                  |
| Ser64   | 3.48                        | 0.15                     | 0.02        | 0.46         | -0.02                  |
| Asp69   | 3.94                        | 0.16                     | 0.01        | 0.27         | 0.04                   |
| Arg71   | 4.30                        | 0.17                     | 0.01        | 0.37         | 0.01                   |
| Val72   | 3.05                        | 0.14                     | 0.01        | 1.20         | -0.01                  |
| Thr73   | 9.82                        | 0.33                     | 0.01        | 0.62         | -0.04                  |
| Val75   | 2.09                        | 0.11                     | 0.01        | 0.33         | -0.01                  |
| Met92   | 3.38                        | 0.14                     | 0.01        | 1.00         | 0.09                   |
| Val93   | 5.11                        | 0.19                     | 0.01        | 0.63         | -0.13                  |
| Leu104  | 2.47                        | 0.12                     | 0.01        | 0.48         | 0.14                   |
| Gln108  | 4.41                        | 0.17                     | 0.01        | 0.51         | 0.01                   |
| Leu112  | 2.43                        | 0.12                     | 0.01        | 0.51         | 0.12                   |
| Thr113  | 6.68                        | 0.23                     | 0.01        | 0.31         | -0.18                  |
| His114  | 3.69                        | 0.15                     | 0.01        | 1.08         | 0.04                   |
| Ile115  | 6.36                        | 0.22                     | 0.01        | 1.68         | 0.01                   |

---

|               |      |      |      |      |       |
|---------------|------|------|------|------|-------|
| <b>Asp116</b> | 5.24 | 0.19 | 0.01 | 1.46 | -0.22 |
| <b>Ala117</b> | 9.58 | 0.32 | 0.01 | 0.57 | 0.36  |
| <b>Glu120</b> | 4.15 | 0.16 | 0.01 | 0.29 | 0.20  |
| <b>Gly121</b> | 7.71 | 0.26 | 0.01 | 1.67 | -0.28 |
| <b>His124</b> | 9.14 | 0.30 | 0.01 | 2.99 | N/A   |
| <b>Val136</b> | 2.44 | 0.12 | 0.01 | 0.34 | -0.07 |
| <b>Asp144</b> | 3.46 | 0.15 | 0.01 | 0.30 | 0.24  |
| <b>Asn147</b> | 3.62 | 0.15 | 0.01 | 0.43 | 0.14  |
| <b>Ser148</b> | 3.75 | 0.15 | 0.01 | 0.33 | -0.19 |
| <b>His149</b> | 5.23 | 0.19 | 0.01 | 0.27 | 0.15  |
| <b>Cys152</b> | 2.20 | 0.11 | 0.01 | 0.36 | 0.07  |

---

**Table S6.** Fitted values of  $R_{ex}$  (at 18.8 T) and  $|\Delta\omega_N|$  for amide  $^{15}\text{N}$  probes in the L28F E:THF:NADPH complex. Residues with  $R_{ex}$  smaller than  $2\text{ s}^{-1}$  are omitted. The  $X^2$  per degree of freedom (DoF) is calculated from the combined fit of  $^{15}\text{N}$  and  $^1\text{H}$  amide dispersion curves to the global  $k_{ex}$  and  $p_b$ , except for Gly95 where only  $^{15}\text{N}$  data are available. The equilibrium shift difference  $\Delta\delta_N$  is calculated as the difference in  $^{15}\text{N}$  chemical shift between the L28F E:THF:NADPH and L28F E:NADPH complexes. The  $^{15}\text{N}$  and  $^1\text{H}$  resonances of Ile14 have not been assigned for the L28F E:NADPH complex, hence  $\Delta\delta_N$  is unavailable for that residue.

| Residue       | $R_{ex}$ ( $\text{s}^{-1}$ ) | $ \Delta\omega_N $ (ppm) | error (ppm) | sign | $X^2/\text{DoF}$ | $\Delta\delta_N$ (ppm) |
|---------------|------------------------------|--------------------------|-------------|------|------------------|------------------------|
| <b>Ala7</b>   | 15.75                        | 2.77                     | 0.07        | ND   | 1.53             | -3.42                  |
| <b>Leu8</b>   | 15.81                        | 2.80                     | 0.07        | ND   | 1.94             | 1.50                   |
| <b>Ile14</b>  | 12.96                        | 2.05                     | 0.05        | +    | 1.29             | N/A                    |
| <b>Gly15</b>  | 8.74                         | 1.39                     | 0.04        | +    | 2.60             | 0.63                   |
| <b>Ala19</b>  | 8.81                         | 1.40                     | 0.03        | +    | 0.46             | 1.92                   |
| <b>Asn23</b>  | 10.52                        | 1.64                     | 0.05        | +    | 0.63             | 1.66                   |
| <b>Ala26</b>  | 7.51                         | 1.23                     | 0.03        | -    | 0.27             | -1.41                  |
| <b>Ala29</b>  | 10.76                        | 1.67                     | 0.04        | +    | 0.79             | 0.41                   |
| <b>Trp30</b>  | 11.00                        | 1.71                     | 0.05        | +    | 0.94             | 1.71                   |
| <b>Phe31</b>  | 5.95                         | 1.04                     | 0.04        | +    | 0.53             | 1.18                   |
| <b>Lys32</b>  | 15.71                        | 2.76                     | 0.06        | +    | 1.04             | 1.87                   |
| <b>Arg33</b>  | 8.11                         | 1.31                     | 0.03        | +    | 0.52             | 0.97                   |
| <b>Asn34</b>  | 2.51                         | 0.62                     | 0.05        | -    | 1.07             | 0.11                   |
| <b>Thr35</b>  | 7.84                         | 1.27                     | 0.04        | +    | 1.08             | 1.03                   |
| <b>Val40</b>  | 16.06                        | 2.89                     | 0.07        | ND   | 2.32             | 2.76                   |
| <b>Arg52</b>  | 7.95                         | 1.29                     | 0.03        | ND   | 1.64             | -0.37                  |
| <b>Arg57</b>  | 10.05                        | 1.57                     | 0.04        | +    | 0.24             | 1.26                   |
| <b>Asn59</b>  | 11.05                        | 1.72                     | 0.04        | +    | 0.61             | 1.26                   |
| <b>Ala83</b>  | 2.51                         | 0.62                     | 0.04        | +    | 0.39             | 0.34                   |
| <b>Asp87</b>  | 5.86                         | 1.03                     | 0.05        | +    | 0.22             | 0.15                   |
| <b>Val93</b>  | 9.97                         | 1.55                     | 0.03        | ND   | 0.49             | -0.98                  |
| <b>Gly95</b>  | 12.92                        | 2.05                     | 0.05        | ND   | 1.81             | 1.57                   |
| <b>Leu104</b> | 2.13                         | 0.57                     | 0.04        | ND   | 0.31             | 0.02                   |
| <b>Gln108</b> | 2.01                         | 0.55                     | 0.04        | ND   | 0.22             | -0.54                  |
| <b>Tyr111</b> | 5.00                         | 0.93                     | 0.03        | ND   | 0.32             | -0.60                  |
| <b>Leu112</b> | 7.61                         | 1.24                     | 0.03        | +    | 0.25             | 1.01                   |
| <b>His114</b> | 5.12                         | 0.95                     | 0.04        | ND   | 1.22             | 0.61                   |
| <b>Ile115</b> | 8.04                         | 1.30                     | 0.03        | ND   | 0.68             | 1.34                   |
| <b>Asp116</b> | 7.26                         | 1.20                     | 0.03        | -    | 1.70             | -0.90                  |
| <b>Ala117</b> | 8.07                         | 1.30                     | 0.03        | +    | 0.48             | 1.09                   |
| <b>Glu118</b> | 2.91                         | 0.67                     | 0.04        | ND   | 0.56             | -0.45                  |
| <b>Glu120</b> | 13.81                        | 2.23                     | 0.06        | +    | 1.13             | 1.96                   |
| <b>Gly121</b> | 17.75                        | 3.71                     | 0.08        | ND   | 1.62             | 3.91                   |
| <b>His124</b> | 19.80                        | 6.36                     | 0.20        | ND   | 1.05             | -5.91                  |
| <b>Ser138</b> | 3.08                         | 0.69                     | 0.04        | ND   | 0.32             | -0.02                  |
| <b>Ser148</b> | 4.90                         | 0.92                     | 0.04        | +    | 0.20             | 0.67                   |
| <b>His149</b> | 14.49                        | 2.40                     | 0.05        | ND   | 1.49             | 2.78                   |
| <b>Ser150</b> | 6.38                         | 1.09                     | 0.03        | ND   | 0.57             | -1.12                  |

**Table S7.** Fitted values of  $R_{ex}$  (at 18.8 T, 800 MHz) and  $|\Delta\omega_H|$  for amide  $^1H$  probes in the L28F E:THF:NADPH complex. Residues with  $R_{ex}$  smaller than  $2\text{ s}^{-1}$  are omitted. The  $X^2$  per degree of freedom (DoF) is calculated from the combined fit of  $^{15}N$  and  $^1H$  amide dispersion curves to the global  $k_{ex}$  and  $p_b$ . The equilibrium shift difference  $\Delta\delta_H$  is calculated as the difference in proton chemical shift between the L28F E:THF:NADPH and L28F E:NADPH complexes. The  $^{15}N$  and  $^1H$  resonances of Ile14 have not been assigned for the L28F E:NADPH complex, hence  $\Delta\delta_H$  is not available for that residue.

| Residue | $R_{ex}$ ( $s^{-1}$ ) | $ \Delta\omega_H $ (ppm) | error (ppm) | $X^2/DoF$ | $ \Delta\delta_H $ (ppm) |
|---------|-----------------------|--------------------------|-------------|-----------|--------------------------|
| Ile2    | 5.88                  | 0.105                    | 0.005       | 0.33      | 0.12                     |
| Ser3    | 6.32                  | 0.110                    | 0.005       | 0.34      | 0.08                     |
| Leu4    | 2.89                  | 0.068                    | 0.004       | 0.21      | 0.03                     |
| Ala7    | 20.76                 | 1.42                     | 0.06        | 1.53      | -1.89                    |
| Leu8    | 10.24                 | 0.161                    | 0.004       | 1.94      | -0.08                    |
| Ile14   | 19.35                 | 0.55                     | 0.02        | 1.29      | N/A                      |
| Gly15   | 20.84                 | 1.70                     | 0.08        | 2.60      | 1.54                     |
| Ala19   | 10.72                 | 0.17                     | 0.01        | 0.46      | 0.17                     |
| Asn23   | 19.67                 | 0.61                     | 0.03        | 0.63      | 0.59                     |
| Ala26   | 15.24                 | 0.26                     | 0.01        | 0.27      | -0.16                    |
| Ala29   | 17.80                 | 0.38                     | 0.02        | 0.79      | 0.26                     |
| Trp30   | 17.98                 | 0.39                     | 0.02        | 0.94      | 0.54                     |
| Phe31   | 17.20                 | 0.34                     | 0.01        | 0.53      | 0.38                     |
| Lys32   | 18.16                 | 0.41                     | 0.02        | 1.04      | 0.51                     |
| Arg33   | 19.80                 | 0.65                     | 0.02        | 0.52      | 0.51                     |
| Asn34   | 15.20                 | 0.26                     | 0.01        | 1.07      | 0.26                     |
| Thr35   | 10.84                 | 0.17                     | 0.01        | 1.08      | 0.13                     |
| Lys38   | 16.06                 | 0.29                     | 0.01        | 0.52      | 0.28                     |
| Val40   | 17.78                 | 0.38                     | 0.01        | 2.32      | 0.27                     |
| Arg44   | 2.83                  | 0.07                     | 0.01        | 0.23      | 0.00                     |
| Ser49   | 5.53                  | 0.101                    | 0.004       | 0.49      | 0.05                     |
| Gly51   | 10.22                 | 0.161                    | 0.005       | 0.76      | -0.01                    |
| Arg52   | 9.84                  | 0.156                    | 0.004       | 1.64      | 0.02                     |
| Leu54   | 18.94                 | 0.48                     | 0.02        | 1.27      | -0.36                    |
| Arg57   | 15.79                 | 0.28                     | 0.01        | 0.24      | 0.07                     |
| Lys58   | 20.21                 | 0.80                     | 0.02        | 0.81      | -0.50                    |
| Asn59   | 15.78                 | 0.28                     | 0.01        | 0.61      | 0.15                     |
| Ile61   | 2.96                  | 0.069                    | 0.005       | 0.84      | 0.03                     |
| Leu62   | 10.28                 | 0.16                     | 0.01        | 0.76      | 0.09                     |
| Ser64   | 4.07                  | 0.08                     | 0.01        | 0.56      | -0.01                    |
| Asp69   | 3.92                  | 0.08                     | 0.01        | 0.36      | -0.01                    |
| Arg71   | 5.43                  | 0.100                    | 0.005       | 0.25      | -0.03                    |
| Val72   | 3.63                  | 0.077                    | 0.004       | 0.97      | -0.02                    |
| Trp74   | 2.48                  | 0.062                    | 0.005       | 1.04      | 0.02                     |
| Val75   | 5.19                  | 0.097                    | 0.004       | 0.23      | 0.05                     |
| Val78   | 2.97                  | 0.07                     | 0.01        | 0.25      | 0.04                     |
| Glu80   | 3.13                  | 0.07                     | 0.01        | 0.30      | 0.03                     |
| Ala81   | 6.51                  | 0.112                    | 0.005       | 0.35      | 0.05                     |
| Ile82   | 10.55                 | 0.17                     | 0.01        | 0.33      | 0.09                     |

---

|               |       |       |       |      |       |
|---------------|-------|-------|-------|------|-------|
| <b>Ala83</b>  | 4.23  | 0.08  | 0.01  | 0.39 | 0.06  |
| <b>Cys85</b>  | 2.99  | 0.07  | 0.01  | 0.21 | 0.04  |
| <b>Gly86</b>  | 4.02  | 0.082 | 0.004 | 2.92 | -0.03 |
| <b>Asp87</b>  | 7.92  | 0.13  | 0.01  | 0.22 | 0.03  |
| <b>Glu90</b>  | 7.76  | 0.128 | 0.004 | 0.41 | 0.11  |
| <b>Ile91</b>  | 2.53  | 0.06  | 0.01  | 3.27 | 0.02  |
| <b>Met92</b>  | 11.59 | 0.18  | 0.01  | 0.75 | 0.10  |
| <b>Val93</b>  | 4.02  | 0.082 | 0.005 | 0.49 | 0.00  |
| <b>Ile94</b>  | 13.35 | 0.22  | 0.01  | 0.46 | 0.21  |
| <b>Gln102</b> | 4.83  | 0.092 | 0.004 | 0.45 | 0.04  |
| <b>Leu104</b> | 2.86  | 0.07  | 0.01  | 0.31 | 0.04  |
| <b>Lys106</b> | 2.39  | 0.06  | 0.01  | 0.48 | 0.00  |
| <b>Gln108</b> | 4.79  | 0.09  | 0.01  | 0.22 | 0.00  |
| <b>Leu110</b> | 8.47  | 0.14  | 0.01  | 0.54 | 0.08  |
| <b>Tyr111</b> | 5.40  | 0.10  | 0.01  | 0.32 | 0.00  |
| <b>Leu112</b> | 11.97 | 0.19  | 0.01  | 0.25 | 0.10  |
| <b>Thr113</b> | 4.02  | 0.08  | 0.01  | 0.54 | 0.06  |
| <b>His114</b> | 4.08  | 0.08  | 0.01  | 1.22 | -0.01 |
| <b>Ile115</b> | 8.92  | 0.14  | 0.01  | 0.68 | 0.08  |
| <b>Asp116</b> | 15.95 | 0.29  | 0.01  | 1.70 | -0.22 |
| <b>Ala117</b> | 18.09 | 0.40  | 0.01  | 0.48 | 0.38  |
| <b>Glu118</b> | 10.21 | 0.16  | 0.01  | 0.56 | 0.12  |
| <b>Glu120</b> | 14.64 | 0.25  | 0.01  | 1.13 | 0.21  |
| <b>Gly121</b> | 17.25 | 0.35  | 0.01  | 1.62 | -0.32 |
| <b>His124</b> | 19.86 | 0.66  | 0.02  | 1.05 | -0.67 |
| <b>Val136</b> | 3.12  | 0.07  | 0.01  | 0.24 | -0.02 |
| <b>Ser138</b> | 3.34  | 0.074 | 0.005 | 0.32 | -0.07 |
| <b>Phe140</b> | 3.20  | 0.072 | 0.005 | 0.91 | -0.04 |
| <b>Asp144</b> | 2.02  | 0.056 | 0.005 | 0.41 | 0.01  |
| <b>Gln146</b> | 8.89  | 0.14  | 0.01  | 0.52 | 0.10  |
| <b>Asn147</b> | 11.88 | 0.19  | 0.01  | 0.39 | 0.16  |
| <b>Ser148</b> | 16.67 | 0.32  | 0.01  | 0.20 | -0.30 |
| <b>His149</b> | 16.6  | 0.31  | 0.01  | 1.49 | 0.27  |
| <b>Ser150</b> | 2.34  | 0.06  | 0.01  | 0.57 | -0.02 |
| <b>Cys152</b> | 2.34  | 0.06  | 0.01  | 0.31 | 0.04  |
| <b>Glu154</b> | 3.19  | 0.07  | 0.01  | 0.43 | 0.05  |

---

**Table S8.** Fitted values of  $R_{ex}$  (at 18.8 T) and  $|\Delta\omega_N|$  for amide  $^{15}\text{N}$  probes in the L28F E:THF:NADP<sup>+</sup> complex. Residues with  $R_{ex}$  smaller than  $2\text{ s}^{-1}$  are omitted. The  $X^2$  per degree of freedom (DoF) is calculated from the combined fit of  $^{15}\text{N}$  and  $^1\text{H}$  amide dispersion curves to the global  $k_{ex}$  and  $p_b$ , except for Gly95 where only  $^{15}\text{N}$  data are available. The equilibrium shift difference  $\Delta\delta_N$  is calculated as the difference in  $^{15}\text{N}$  chemical shift between the L28F E:THF:NADP<sup>+</sup> and L28F E:FOL:NADP<sup>+</sup> complexes. The  $^{15}\text{N}$  and  $^1\text{H}$  resonances of Ala7, Ile14 and His124 have not been assigned for the L28F E:FOL:NADP<sup>+</sup> complex, hence  $\Delta\delta_N$  is not available for these residues.

| Residue       | $R_{ex}$ ( $\text{s}^{-1}$ ) | $ \Delta\omega_N $ (ppm) | error (ppm) | sign | $X^2/\text{DoF}$ | $\Delta\delta_N$ (ppm) |
|---------------|------------------------------|--------------------------|-------------|------|------------------|------------------------|
| <b>Ala7</b>   | 6.77                         | 1.21                     | 0.04        | ND   | 1.51             | N/A                    |
| <b>Leu8</b>   | 8.08                         | 1.37                     | 0.04        | ND   | 1.11             | 0.56                   |
| <b>Ile14</b>  | 18.22                        | 3.25                     | 0.08        | +    | 1.67             | N/A                    |
| <b>Gly15</b>  | 17.79                        | 3.11                     | 0.08        | -    | 10.12            | -2.98                  |
| <b>Ala19</b>  | 8.04                         | 1.36                     | 0.03        | ND   | 0.48             | 0.58                   |
| <b>Asn23</b>  | 8.66                         | 1.44                     | 0.04        | +    | 0.89             | 0.98                   |
| <b>Leu24</b>  | 17.48                        | 3.02                     | 0.06        | ND   | 1.22             | -2.09                  |
| <b>Ala26</b>  | 4.45                         | 0.93                     | 0.04        | -    | 0.35             | -0.24                  |
| <b>Asp27</b>  | 5.85                         | 1.10                     | 0.03        | ND   | 1.23             | 0.99                   |
| <b>Ala29</b>  | 4.83                         | 0.97                     | 0.04        | ND   | 0.70             | 0.11                   |
| <b>Trp30</b>  | 4.79                         | 0.97                     | 0.04        | +    | 0.58             | 0.39                   |
| <b>Phe31</b>  | 6.59                         | 1.19                     | 0.03        | ND   | 1.28             | 0.49                   |
| <b>Lys32</b>  | 6.04                         | 1.12                     | 0.04        | +    | 1.19             | -0.32                  |
| <b>Arg33</b>  | 2.92                         | 0.73                     | 0.04        | +    | 0.72             | 0.22                   |
| <b>Thr35</b>  | 3.42                         | 0.80                     | 0.05        | +    | 1.13             | 0.18                   |
| <b>Leu36</b>  | 5.57                         | 1.07                     | 0.04        | -    | 1.27             | 0.23                   |
| <b>Asn37</b>  | 3.17                         | 0.76                     | 0.04        | ND   | 1.67             | 0.48                   |
| <b>Val40</b>  | 12.56                        | 1.98                     | 0.04        | ND   | 0.63             | 1.58                   |
| <b>Arg44</b>  | 2.44                         | 0.66                     | 0.04        | ND   | 0.55             | -0.30                  |
| <b>Gly51</b>  | 2.08                         | 0.60                     | 0.04        | ND   | 1.71             | 0.65                   |
| <b>Arg52</b>  | 5.64                         | 1.07                     | 0.03        | +    | 0.78             | 0.40                   |
| <b>Leu54</b>  | 2.59                         | 0.68                     | 0.04        | ND   | 1.17             | 0.23                   |
| <b>Arg57</b>  | 3.02                         | 0.74                     | 0.03        | ND   | 0.30             | -0.05                  |
| <b>Asn59</b>  | 3.52                         | 0.81                     | 0.06        | ND   | 0.59             | -0.06                  |
| <b>Asp87</b>  | 6.49                         | 1.18                     | 0.04        | ND   | 0.97             | 0.05                   |
| <b>Val93</b>  | 6.63                         | 1.19                     | 0.03        | ND   | 1.21             | -0.65                  |
| <b>Gly95</b>  | 10.14                        | 1.63                     | 0.03        | ND   | 2.16             | 1.40                   |
| <b>Leu104</b> | 2.30                         | 0.64                     | 0.04        | ND   | 0.76             | -0.06                  |
| <b>Gln108</b> | 2.20                         | 0.62                     | 0.05        | ND   | 0.44             | -0.35                  |
| <b>Tyr111</b> | 4.05                         | 0.88                     | 0.03        | ND   | 0.63             | -0.58                  |
| <b>Leu112</b> | 4.82                         | 0.97                     | 0.03        | ND   | 0.67             | 0.00                   |
| <b>Ile115</b> | 3.55                         | 0.81                     | 0.03        | ND   | 1.27             | 0.51                   |
| <b>Asp116</b> | 6.31                         | 1.15                     | 0.03        | -    | 1.93             | -0.98                  |
| <b>Ala117</b> | 7.96                         | 1.35                     | 0.03        | +    | 0.74             | 0.98                   |
| <b>Glu118</b> | 5.72                         | 1.08                     | 0.03        | ND   | 0.55             | -1.20                  |
| <b>Val119</b> | 18.84                        | 3.48                     | 0.09        | ND   | 4.95             | 4.64                   |
| <b>Glu120</b> | 11.94                        | 1.88                     | 0.05        | +    | 0.86             | 1.84                   |
| <b>Gly121</b> | 18.94                        | 3.52                     | 0.07        | ND   | 0.88             | 3.66                   |



---

|               |       |      |      |    |      |       |
|---------------|-------|------|------|----|------|-------|
| <b>His124</b> | 20.65 | 4.41 | 0.14 | ND | 4.54 | N/A   |
| <b>Phe140</b> | 2.00  | 0.59 | 0.04 | ND | 1.37 | -0.43 |
| <b>Ser148</b> | 3.49  | 0.80 | 0.04 | +  | 0.52 | 0.39  |
| <b>His149</b> | 14.91 | 2.39 | 0.05 | ND | 0.61 | 1.95  |
| <b>Ser150</b> | 3.98  | 0.87 | 0.03 | ND | 0.80 | -0.53 |

---

**Table S9.** Fitted values of  $R_{ex}$  (at 18.8 T, 800 MHz) and  $|\Delta\omega_H|$  for amide  $^1H$  probes in the L28F E:THF:NADP<sup>+</sup> complex. Residues with  $R_{ex}$  smaller than 2 s<sup>-1</sup> are omitted. The  $X^2$  per degree of freedom (DoF) is calculated from the combined fit of  $^{15}N$  and  $^1H$  amide dispersion curves to the global  $k_{ex}$  and  $p_b$ . The equilibrium shift difference  $\Delta\delta_H$  is calculated as the difference in proton chemical shift between the L28F E:THF:NADP<sup>+</sup> and L28F E:FOL:NADP<sup>+</sup> complexes. The  $^{15}N$  and  $^1H$  resonances of Ile14 have not been assigned for the L28F E:FOL:NADP<sup>+</sup> complex, hence  $\Delta\delta_H$  is unavailable for that residue.

| Residue | $R_{ex}$ (s <sup>-1</sup> ) | $ \Delta\omega_H $ (ppm) | error (ppm) | $X^2/DoF$ | $ \Delta\delta_H $ (ppm) |
|---------|-----------------------------|--------------------------|-------------|-----------|--------------------------|
| Ile2    | 3.25                        | 0.078                    | 0.007       | 0.42      | -0.01                    |
| Ser3    | 2.70                        | 0.071                    | 0.005       | 0.65      | 0.01                     |
| Leu4    | 3.80                        | 0.086                    | 0.004       | 0.53      | -0.09                    |
| Ala7    | 23.64                       | 1.06                     | 0.05        | 1.51      | N/A                      |
| Leu8    | 14.67                       | 0.238                    | 0.007       | 1.11      | -0.13                    |
| Ile14   | 22.39                       | 0.63                     | 0.03        | 1.67      | N/A                      |
| Gly15   | 23.75                       | 1.14                     | 0.10        | 10.12     | 1.26                     |
| Ala19   | 7.84                        | 0.136                    | 0.004       | 0.48      | 0.03                     |
| Asn23   | 19.39                       | 0.38                     | 0.02        | 0.89      | 0.41                     |
| Leu24   | 10.02                       | 0.164                    | 0.005       | 1.22      | -0.10                    |
| Ala26   | 13.50                       | 0.216                    | 0.006       | 0.35      | -0.10                    |
| Asp27   | 6.04                        | 0.114                    | 0.005       | 1.23      | 0.03                     |
| Ala29   | 12.32                       | 0.197                    | 0.005       | 0.70      | 0.13                     |
| Trp30   | 13.23                       | 0.211                    | 0.007       | 0.58      | 0.20                     |
| Phe31   | 17.52                       | 0.31                     | 0.01        | 1.28      | 0.34                     |
| Lys32   | 17.72                       | 0.313                    | 0.009       | 1.19      | 0.17                     |
| Arg33   | 10.95                       | 0.176                    | 0.006       | 0.72      | 0.19                     |
| Asn34   | 11.02                       | 0.177                    | 0.005       | 1.15      | 0.14                     |
| Thr35   | 8.26                        | 0.141                    | 0.007       | 1.13      | 0.09                     |
| Leu36   | 15.91                       | 0.264                    | 0.009       | 1.27      | 0.15                     |
| Asn37   | 15.12                       | 0.247                    | 0.008       | 1.67      | -0.02                    |
| Lys38   | 5.27                        | 0.104                    | 0.004       | 0.42      | -0.05                    |
| Val40   | 4.54                        | 0.095                    | 0.005       | 0.63      | 0.00                     |
| Arg44   | 4.02                        | 0.088                    | 0.006       | 0.55      | -0.04                    |
| Ser49   | 9.76                        | 0.160                    | 0.005       | 2.76      | -0.04                    |
| Gly51   | 9.60                        | 0.158                    | 0.004       | 1.71      | 0.16                     |
| Arg52   | 14.83                       | 0.241                    | 0.005       | 0.78      | 0.09                     |
| Leu54   | 9.62                        | 0.158                    | 0.005       | 1.17      | -0.07                    |
| Arg57   | 4.46                        | 0.094                    | 0.004       | 0.30      | 0.02                     |
| Lys58   | 10.36                       | 0.168                    | 0.004       | 0.78      | 0.00                     |
| Asn59   | 4.34                        | 0.093                    | 0.007       | 0.59      | -0.06                    |
| Ile61   | 2.30                        | 0.065                    | 0.005       | 1.46      | -0.03                    |
| Leu62   | 4.35                        | 0.093                    | 0.004       | 0.72      | -0.10                    |
| Ser63   | 3.55                        | 0.082                    | 0.005       | 0.47      | -0.05                    |
| Ser64   | 3.94                        | 0.087                    | 0.008       | 0.39      | -0.03                    |
| Gln65   | 2.23                        | 0.063                    | 0.007       | 0.61      | 0.00                     |
| Asp69   | 4.68                        | 0.097                    | 0.008       | 0.49      | 0.03                     |
| Arg71   | 4.18                        | 0.091                    | 0.005       | 0.34      | 0.02                     |
| Val72   | 3.44                        | 0.081                    | 0.005       | 1.14      | -0.03                    |
| Thr73   | 14.17                       | 0.228                    | 0.005       | 0.33      | -0.03                    |

|               |       |       |       |      |       |
|---------------|-------|-------|-------|------|-------|
| <b>Val75</b>  | 2.72  | 0.071 | 0.003 | 0.42 | 0.00  |
| <b>Ile82</b>  | 3.65  | 0.084 | 0.006 | 0.51 | 0.01  |
| <b>Asp87</b>  | 9.37  | 0.155 | 0.006 | 0.97 | -0.01 |
| <b>Glu90</b>  | 4.18  | 0.091 | 0.004 | 0.44 | 0.02  |
| <b>Met92</b>  | 8.80  | 0.148 | 0.003 | 1.17 | 0.13  |
| <b>Val93</b>  | 14.37 | 0.232 | 0.006 | 1.21 | -0.12 |
| <b>Leu104</b> | 7.81  | 0.135 | 0.004 | 0.76 | 0.12  |
| <b>Lys106</b> | 2.16  | 0.062 | 0.007 | 1.11 | -0.02 |
| <b>Gln108</b> | 4.64  | 0.096 | 0.005 | 0.44 | 0.02  |
| <b>Leu110</b> | 5.17  | 0.103 | 0.004 | 0.76 | 0.00  |
| <b>Tyr111</b> | 5.47  | 0.107 | 0.005 | 0.63 | -0.12 |
| <b>Leu112</b> | 9.23  | 0.153 | 0.004 | 0.67 | 0.12  |
| <b>Thr113</b> | 12.85 | 0.205 | 0.005 | 0.85 | -0.18 |
| <b>His114</b> | 7.12  | 0.127 | 0.005 | 1.41 | 0.03  |
| <b>Ile115</b> | 8.82  | 0.148 | 0.005 | 1.27 | 0.01  |
| <b>Asp116</b> | 13.96 | 0.224 | 0.005 | 1.93 | -0.20 |
| <b>Ala117</b> | 19.15 | 0.37  | 0.01  | 0.74 | 0.37  |
| <b>Glu118</b> | 6.98  | 0.125 | 0.004 | 0.55 | 0.04  |
| <b>Val119</b> | 20.05 | 0.41  | 0.01  | 4.95 | 0.53  |
| <b>Glu120</b> | 12.58 | 0.201 | 0.006 | 0.86 | 0.19  |
| <b>Gly121</b> | 17.27 | 0.299 | 0.007 | 0.88 | -0.29 |
| <b>His124</b> | 22.93 | 0.748 | 0.026 | 4.54 | N/A   |
| <b>Val136</b> | 5.46  | 0.107 | 0.004 | 0.40 | -0.07 |
| <b>Asp142</b> | 2.54  | 0.068 | 0.004 | 0.59 | 0.04  |
| <b>Ala143</b> | 2.93  | 0.074 | 0.004 | 1.29 | -0.05 |
| <b>Asp144</b> | 4.62  | 0.096 | 0.003 | 0.54 | 0.19  |
| <b>Asn147</b> | 11.55 | 0.185 | 0.006 | 0.27 | 0.17  |
| <b>Ser148</b> | 16.52 | 0.279 | 0.009 | 0.52 | -0.32 |
| <b>His149</b> | 15.24 | 0.249 | 0.006 | 0.61 | 0.15  |
| <b>Cys152</b> | 8.60  | 0.145 | 0.005 | 0.57 | 0.13  |
| <b>Glu154</b> | 4.65  | 0.096 | 0.004 | 0.66 | 0.04  |

**Table S10.** Populations of species present under NMR conditions (18 mM THF, 10 mM NADP(H)), obtained by simulation of the kinetic scheme of Figure 6 for dissociation of THF from E:THF:NADPH and E:THF:NADP<sup>+</sup>. Rate constants from Tables 2 and 3 were used, together with the THF association rates measured in MTEN buffer at pH 6 (Fierke, C. A.; Johnson, K. A.; Benkovic, S. J. *Biochemistry* **1987**, *26*, 4085.)

| Complex                    | populations |           |           |         |
|----------------------------|-------------|-----------|-----------|---------|
|                            | occE:T:N(H) | cE:T:N(H) | occE:N(H) | cE:N(H) |
| WT E:THF:NADPH             | 99.3        | 0.69      | < 0.001   | 0.022   |
| WT E:THF:NADP <sup>+</sup> | 98.7        | 1.25      | < 0.001   | < 0.001 |
